# Supplementary material for: Cochrane's risk of bias tool for non-randomized studies (ROBINS-I) is frequently misapplied: A methodological systematic review
Source: PubMed Central journal article supplement (PMC8809341; doi:10.1016/j.jclinepi.2021.08.022), 2021-12

# Cochrane’s risk-of-bias tool for non-randomised studies (ROBINS-I) is frequently misapplied: a methodological systematic review

Supplementary Tables and Figures

Erik Igelström, Mhairi Campbell, Peter Craig, S. Vittal Katikireddi

## Contents

|                                                                                                                                                                                                                                      |    |
|--------------------------------------------------------------------------------------------------------------------------------------------------------------------------------------------------------------------------------------|----|
| Supplementary Table 1: List of included systematic reviews . . . . .                                                                                                                                                                 | 2  |
| Supplementary Table 2: Publications excluded after full-text screening . . . . .                                                                                                                                                     | 10 |
| Supplementary Table 3: Characteristics of the included systematic reviews . . . . .                                                                                                                                                  | 13 |
| Supplementary Table 4: Modifications and non-standard uses of ROBINS-I . . . . .                                                                                                                                                     | 17 |
| Supplementary Table 5: Overall ROBINS-I risk-of-bias judgements compared to the highest judgement in an individual domain . . . . .                                                                                                  | 23 |
| Supplementary Figure 1: Summary of quality ratings of the included systematic reviews for each individual item in the AMSTAR 2 tool . . . . .                                                                                        | 24 |
| Supplementary Figure 2: Distribution of risk-of-bias judgements in each bias domain for studies assessed using ROBINS-I within the included systematic reviews, stratified by the AMSTAR 2 confidence rating of the review . . . . . | 25 |

## Supplementary Table 1: List of included systematic reviews

| Reference                                                                                                                                                                                                                                                                                 | DOI                                       |
|-------------------------------------------------------------------------------------------------------------------------------------------------------------------------------------------------------------------------------------------------------------------------------------------|-------------------------------------------|
| 1 Agnelli G, Belch JFF, Baumgartner I, Giovass P, Hoffmann U. Morbidity and mortality associated with atherosclerotic peripheral artery disease: A systematic review. <i>Atherosclerosis</i> . 2020 Jan;293:94–100.                                                                       | doi:10.1016/j.atherosclerosis.2019.09.012 |
| 2 Alshafei A, Cascio S, Boland F, O'Shea N, Hickey A, Quinn F. Comparing the outcomes of tubularized incised plate urethroplasty and dorsal inlay graft urethroplasty in children with hypospadias: A systematic review and meta-analysis. <i>J Pediatr Urol</i> . 2020 Apr;16(2):154–61. | doi:10.1016/j.jpuro.2020.01.009           |
| 3 Arn M-L, Dritsas K, Pandis N, Kloukos D. The effects of fixed orthodontic retainers on periodontal health: A systematic review. <i>Am J Orthod Dentofacial Orthop</i> . 2020 Feb;157(2):156–164.e17.                                                                                    | doi:10.1016/j.ajodo.2019.10.010           |
| 4 Baker BS, Stannard MS, Duren DL, Cook JL, Stannard JP. Does blood flow restriction therapy in patients older than age 50 result in muscle hypertrophy, increased strength, or greater physical function? A systematic review. <i>Clin Orthop</i> . 2020 Dec;478(3):593–606.             | doi:10.1097/CORR.0000000000001090         |
| 5 Balla A, Alarcon I, Morales-Conde S. Minimally invasive component separation technique for large ventral hernia: Which is the best choice? A systematic literature review. <i>Surg Endosc</i> . 2020 Oct;34(1):14–30.                                                                   | doi:10.1007/s00464-019-07156-4            |
| 6 Bang CS, Yang YJ, Lee JJ, Baik GH. Endoscopic submucosal dissection of early gastric cancer with mixed-type histology: A systematic review. <i>Dig Dis Sci</i> . 2020 Jul;65(1):276–91.                                                                                                 | doi:10.1007/s10620-019-05761-w            |
| 7 Belachew A, Tewabe T, Dessie G. Neonatal mortality and its association with antenatal care visits among live births in Ethiopia: A systematic review and meta-analysis. <i>J Matern Fetal Neonatal Med</i> . 2020 Jan;1–8.                                                              | doi:10.1080/14767058.2020.1718093         |
| 8 Belk JW, Kraeutler MJ, Houck DA, Smith JR, McCarty EC. Comparing hamstring autograft with hybrid graft for anterior cruciate ligament reconstruction: A systematic review. <i>Arthroscopy</i> . 2020 Apr;36(4):1189–201.                                                                | doi:10.1016/j.arthro.2019.10.010          |
| 9 Bellos I, Kontzoglou K, Perrea DN. Predictors of tolvaptan short-term response in patients with refractory ascites: A meta-analysis. <i>J Gastroenterol Hepatol</i> . 2020 Aug;35(2):182–91.                                                                                            | doi:10.1111/jgh.14784                     |
| 10 Bezczky Z, El-Banna A, Petrou S, Kemp A, Scourfield J, Forrester D, et al. Intensive family preservation services to prevent out-of-home placement of children: A systematic review and meta-analysis. <i>Child Abuse Negl</i> . 2020 Apr;102:104394.                                  | doi:10.1016/j.chiabu.2020.104394          |
| 11 Brennan SE, McDonald S, Page MJ, Reid J, Ward S, Forbes AB, et al. Long-term effects of alcohol consumption on cognitive function: A systematic review and dose-response analysis of evidence published between 2007 and 2018. <i>Syst Rev</i> . 2020 Feb;9(1):33.                     | doi:10.1186/s13643-019-1220-4             |
| 12 Brouwer RJ, Laliu RC, Hoencamp R, Hulst RA van, Ubbink DT. A systematic review and meta-analysis of hyperbaric oxygen therapy for diabetic foot ulcers with arterial insufficiency. <i>J Vasc Surg</i> . 2020 Feb;71(2):682–692.e1.                                                    | doi:10.1016/j.jvs.2019.07.082             |
| 13 Cardoso PC, Espinosa DG, Mecenas P, Flores-Mir C, Normando D. Pain level between clear aligners and fixed appliances: A systematic review. <i>Prog Orthod</i> . 2020 Jan;21(1):3.                                                                                                      | doi:10.1186/s40510-019-0303-z             |
| 14 Carrier FM, Chass M, Wang HT, Aslanian P, Iorio S, Bilodeau M, et al. Restrictive fluid management strategies and outcomes in liver transplantation: A systematic review. <i>Can J Anaesth</i> . 2020 Sep;67(1):109–27.                                                                | doi:10.1007/s12630-019-01480-y            |
| 15 Carter P, Fou L, Whiter F, Delgado Nunes V, Hasler E, Austin C, et al. Management of mesh complications following surgery for stress urinary incontinence or pelvic organ prolapse: A systematic review. <i>BJOG</i> . 2020 Nov;127(1):28–35.                                          | doi:10.1111/1471-0528.15958               |
| 16 Checcucci E, De Cillis S, Porpiglia F. 3D-printed models and virtual reality as new tools for image-guided robot-assisted nephron-sparing surgery: A systematic review of the newest evidences. <i>Curr Opin Urol</i> . 2020 Jan;30(1):55–64.                                          | doi:10.1097/MOU.0000000000000686          |

| Reference                                                                                                                                                                                                                                                                              | DOI                               |
|----------------------------------------------------------------------------------------------------------------------------------------------------------------------------------------------------------------------------------------------------------------------------------------|-----------------------------------|
| 17 Checcucci E, Veccia A, Fiori C, Amparore D, Manfredi M, Di Dio M, et al. Retzius-sparing robot-assisted radical prostatectomy vs the standard approach: A systematic review and analysis of comparative outcomes. <i>BJU Int.</i> 2020 Aug;125(1):8–16.                             | doi:10.1111/bju.14887             |
| 18 Chen J-Y, Wei S-K, Lai C-C, Weng T-S, Wang H-H. A metaanalysis comparing the efficacy and safety of peramivir with other neuraminidase inhibitors for influenza treatment. <i>Medicina (Kaunas).</i> 2020 Feb;56(2):63.                                                             | doi:10.3390/medicina56020063      |
| 19 Coates D, Makris A, Catling C, Henry A, Scarf V, Watts N, et al. A systematic scoping review of clinical indications for induction of labour. <i>Mastrolia SA, editor. PLoS One.</i> 2020 Jan;15(1):e0228196.                                                                       | doi:10.1371/journal.pone.0228196  |
| 20 Cutts JC, Agius PA, Lin Z, Powell R, Moore K, Draper B, et al. Pregnancy-specific malarial immunity and risk of malaria in pregnancy and adverse birth outcomes: A systematic review. <i>BMC Med.</i> 2020 Jan;18(1).                                                               | doi:10.1186/s12916-019-1467-6     |
| 21 Daugaard CL, Hangaard S, Bartels EM, Gudbergsen H, Christensen R, Bliddal H, et al. The effects of weight loss on imaging outcomes in osteoarthritis of the hip or knee in people who are overweight or obese: A systematic review. <i>Osteoarthritis Cartilage.</i> 2020;28:10–21. | doi:10.1016/j.joca.2019.10.013    |
| 22 Davidson B, Schoen N, Sedighim S, Haldenby R, Dalziel B, Breitbart S, et al. Intrathecal baclofen versus selective dorsal rhizotomy for children with cerebral palsy who are nonambulant: A systematic review. <i>J Neurosurg Pediatr.</i> 2020;25(1):69–77.                        | doi:10.3171/2019.8.PEDS19282      |
| 23 DeNicola N, Grossman D, Marko K, Sonalkar S, Butler Tobah YS, Ganju N, et al. Telehealth interventions to improve obstetric and gynecologic health outcomes: A systematic review. <i>Obstet Gynecol.</i> 2020;135(2):371–82.                                                        | doi:10.1097/AOG.0000000000003646  |
| 24 Di Giuseppe G, Thacker N, Schechter T, Pole JD. Anxiety, depression, and mental health-related quality of life in survivors of pediatric allogeneic hematopoietic stem cell transplantation: A systematic review. <i>Bone Marrow Transplant.</i> 2020 Jan;55(7):1240–54.            | doi:10.1038/s41409-020-0782-z     |
| 25 Djade CD, Porgo TV, Zomahoun HTV, Perrault-Sullivan G, Dionne CE. Incidence of shoulder pain in 40 years old and over and associated factors: A systematic review. <i>Eur J Pain.</i> 2020 Oct;24(1):39–50.                                                                         | doi:10.1002/ejp.1482              |
| 26 Djarv T, Swain JM, Chang WT, Zideman DA, Singletary E. Early or first aid administration versus late or in-hospital administration of aspirin for non-traumatic adult chest pain: A systematic review. <i>Cureus.</i> 2020 Feb;12.                                                  | doi:10.7759/cureus.6862           |
| 27 Falk Brekke A, Overgaard S, Hrobjartsson A, Holsgaard-Larsen A. Non-surgical interventions for excessive anterior pelvic tilt in symptomatic and non-symptomatic adults: A systematic review. <i>EFORT Open Rev.</i> 2020 Jan;5(1):37–45.                                           | doi:10.1302/2058-5241.5.190017    |
| 28 Fang EH, Wang XL, Feng JX, Zhao X. The prognostic role of Glasgow prognostic score and C-reactive protein to albumin ratio for sarcoma: A system review and meta-analysis. <i>Dis Markers.</i> 2020 Jan;2020:1–4.                                                                   | doi:10.1155/2020/8736509          |
| 29 Ford ME, Groet E, Daams JG, Geurtsen GJ, Van Bennekom CAM, Van Someren EJW. Non-pharmacological treatment for insomnia following acquired brain injury: A systematic review. <i>Sleep Med Rev.</i> 2020;50:101255.                                                                  | doi:10.1016/j.smr.2019.101255     |
| 30 Frascella B, Oradini-Alacreu A, Balzarini F, Signorelli C, Lopalco PL, Odone A. Effectiveness of email-based reminders to increase vaccine uptake: A systematic review. <i>Vaccine.</i> 2020 Jan;38(3):433–43.                                                                      | doi:10.1016/j.vaccine.2019.10.089 |
| 31 Froggatt S, Covey J, Reissland N. Infant neurobehavioural consequences of prenatal cigarette exposure: A systematic review and meta-analysis. <i>Acta Paediatr.</i> 2020 Jan;109(6):1112–24.                                                                                        | doi:10.1111/apa.15132             |
| 32 Gagelmann N, Ayuk F, Atanackovic D, Kroger N. B cell maturation antigen-specific chimeric antigen receptor T cells for relapsed or refractory multiple myeloma: A meta-analysis. <i>Eur J Haematol.</i> 2020 Jan;104(4):318–27.                                                     | doi:10.1111/ejh.13380             |
| 33 Gandolla M, Antonietti A, Longatelli V, Pedrocchi A. The effectiveness of wearable upper limb assistive devices in degenerative neuromuscular diseases: A systematic review and meta-analysis. <i>Front Bioeng Biotechnol.</i> 2019;7:450.                                          | doi:10.3389/fbioe.2019.00450      |
| 34 Garbaza C, Hackethal S, Riccardi S, Cajochen C, Cicolin A, D’Agostino A, et al. Polysomnographic features of pregnancy: A systematic review. <i>Sleep Med Rev.</i> 2020 Apr;50:101249.                                                                                              | doi:10.1016/j.smr.2019.101249     |

| Reference                                                                                                                                                                                                                                                                                                                                                                                               | DOI                                     |
|---------------------------------------------------------------------------------------------------------------------------------------------------------------------------------------------------------------------------------------------------------------------------------------------------------------------------------------------------------------------------------------------------------|-----------------------------------------|
| 35 Geierlehner A, Rodi T, Mosahebi A, Tanos G, Wormald JCR. Meta-analysis of venous anastomosis techniques in free flap reconstruction. <i>J Plast Reconstr Aesthet Surg</i> . 2020 Mar;73(3):409–20.                                                                                                                                                                                                   | doi:10.1016/j.bjps.2019.11.033          |
| 36 Gentile D, Donadon M, Lleo A, Aghemo A, Roncalli M, Tommaso L di, et al. Surgical treatment of hepatocholangiocarcinoma: A systematic review. <i>Liver Cancer</i> . 2020 Nov;9(1):15–27.                                                                                                                                                                                                             | doi:10.1159/000503719                   |
| 37 Giannopoulos S, Texakalidis P, Charisis N, Jonnalagadda AK, Chaitidis N, Giannopoulos S, et al. Synchronous carotid endarterectomy and coronary artery bypass graft versus staged carotid artery stenting and coronary artery bypass graft for patients with concomitant severe coronary and carotid stenosis: A systematic review and meta-analysis. <i>Ann Vasc Surg</i> . 2020 Jan;62:463–473.e4. | doi:10.1016/j.avsg.2019.06.018          |
| 38 Giles AE, Valencia M, Parpia S, Fu E, Ruo L, Simunovic M, et al. Simultaneous versus staged resection of rectal cancer and synchronous liver metastases (RESECT): A systematic review and meta-analysis. <i>Eur Surg</i> . 2020 Apr;52(1):15–8.                                                                                                                                                      | doi:10.1007/s10353-019-0582-0           |
| 39 Gogou M, Pavlou E, Haidopoulou K. Therapies that are available and under development for Duchenne muscular dystrophy: What about lung function? <i>Pediatr Pulmonol</i> . 2020;55:300–15.                                                                                                                                                                                                            | doi:10.1002/ppul.24605                  |
| 40 Goldshtein D, Krensky C, Doshi S, Perelman VS. In situ simulation and its effects on patient outcomes: A systematic review. <i>BMJ Simul Technol Enhanc Learn</i> . 2020;6:3–9.                                                                                                                                                                                                                      | doi:10.1136/bmjstel-2018-000387         |
| 41 Gottlieb M, Dyer S, Peksa GD. Beta-blockade for the treatment of cardiac arrest due to ventricular fibrillation or pulseless ventricular tachycardia: A systematic review and meta-analysis. <i>Resuscitation</i> . 2020 Jan;146:118–25.                                                                                                                                                             | doi:10.1016/j.resuscitation.2019.11.019 |
| 42 Graham EA, Deschne SS, Khalil MN, Danna S, Filion KB, Schmitz N. Measures of depression and risk of type 2 diabetes: A systematic review and meta-analysis. <i>J Affect Disord</i> . 2020 Mar;265:224–32.                                                                                                                                                                                            | doi:10.1016/j.jad.2020.01.053           |
| 43 Guo L, Feng S, Sun B, Jiang X, Liu Y. Benefit and risk profile of tofacitinib for the treatment of alopecia areata: A systemic review and meta-analysis. <i>J Eur Acad Dermatol Venereol</i> . 2020;34:192–201.                                                                                                                                                                                      | doi:10.1111/jdv.15937                   |
| 44 Gupta D, Potter TD, Disher T, Eaton K, Goldstein L, Patel L, et al. Comparative effectiveness of catheter ablation devices in the treatment of atrial fibrillation: A network meta-analysis. <i>J Comp Eff Res</i> . 2020;9:115–26.                                                                                                                                                                  | doi:10.2217/cer-2019-0165               |
| 45 Hajibandeh S, Maw A. Diathermy versus scalpel for skin incision in patients undergoing open inguinal hernia repair: A systematic review and meta-analysis. <i>Int J Surg</i> . 2020 Mar;75:35–43.                                                                                                                                                                                                    | doi:10.1016/j.ijso.2020.01.020          |
| 46 Hajibandeh S, Dave M, Tarazi M, Satyadas T. Laparoscopic versus open liver resection for tumors in the posterosuperior segments: A systematic review and meta-analysis. <i>Surg Laparosc Endosc Percutan Tech</i> . 2020;30(2):93–105.                                                                                                                                                               | doi:10.1097/SLE.0000000000000746        |
| 47 Handel MN, Rohde JF, Jacobsen R, Nielsen SM, Christensen R, Alexander DD, et al. Processed meat intake and incidence of colorectal cancer: A systematic review and meta-analysis of prospective observational studies. <i>Eur J Clin Nutr</i> . 2020 Feb;74:1132–48.                                                                                                                                 | doi:10.1038/s41430-020-0576-9           |
| 48 Hasperhoven GF, Al-Nasiry S, Bekker V, Villamor E, Kramer BWW. Universal screening versus risk-based protocols for antibiotic prophylaxis during childbirth to prevent early-onset Group B streptococcal disease: A systematic review and meta-analysis. <i>BJOG</i> . 2020 Feb;127(6):680–91.                                                                                                       | doi:10.1111/1471-0528.16085             |
| 49 Heesen M, Hilber N, Rijs K, Marel C van der, Rossaint R, Schffer L, et al. Intrathecal catheterisation after observed accidental dural puncture in labouring women: Update of a meta-analysis and a trial-sequential analysis. <i>Int J Obstet Anesth</i> . 2020;41:71–82.                                                                                                                           | doi:10.1016/j.ijoa.2019.08.001          |
| 50 Hsu C-Y, Chen C-Y, Lin Y-M, Tam K-W. Efficacy and safety of high-dose vs low-dose leucovorin in patients with colorectal cancer: Systematic review and meta-analysis. <i>Colorectal Dis</i> . 2020 Jul;22(1):17–6.                                                                                                                                                                                   | doi:10.1111/codi.14746                  |

| Reference                                                                                                                                                                                                                                                                                                                          | DOI                                |
|------------------------------------------------------------------------------------------------------------------------------------------------------------------------------------------------------------------------------------------------------------------------------------------------------------------------------------|------------------------------------|
| 51 Hu RQ, Velthoven MH van, Meinert E. Perspectives of people who are overweight and obese on using wearable technology for weight management: Systematic review. <i>JMIR Mhealth Uhealth</i> . 2020 Jan;8(1):e12651.                                                                                                              | doi:10.2196/12651                  |
| 52 Huang YS, Zheng Q, Yang H, Fu X, Zhang X, Xia C, et al. Efficacy of intermittent or continuous very low-energy diets in overweight and obese individuals with type 2 diabetes mellitus: A systematic review and meta-analyses. <i>J Diabetes Res</i> . 2020 Jan;2020:1–21.                                                      | doi:10.1155/2020/4851671           |
| 53 Indarwati F, Mathew S, Munday J, Keogh S. Incidence of peripheral intravenous catheter failure and complications in paediatric patients: Systematic review and meta analysis. <i>Int J Nurs Stud</i> . 2020;102:103488.                                                                                                         | doi:10.1016/j.ijnurstu.2019.103488 |
| 54 Jassal M, Egan G, Dahri K. Opioid prescribing in the elderly: A systematic review. <i>J Pharm Technol</i> . 2020 Aug;36(1):28–40.                                                                                                                                                                                               | doi:10.1177/8755122519867975       |
| 55 Kamfose MM, Muriithi FG, Knight T, Lasserson D, Hayward G. Intravenous ceftriaxone versus multiple dosing regimes of intravenous anti-staphylococcal antibiotics for methicillin-susceptible <i>Staphylococcus aureus</i> (MSSA): A systematic review. <i>Antibiotics (Basel)</i> . 2020 Jan;9(2):39.                           | doi:10.3390/antibiotics9020039     |
| 56 Karamini A, Bakopoulou A, Andreadis D, Gkiouras K, Kritis A. Therapeutic potential of mesenchymal stromal stem cells in rheumatoid arthritis: A systematic review of in vivo studies. <i>Stem Cell Rev Rep</i> . 2020 Jan;16(2):276–87.                                                                                         | doi:10.1007/s12015-020-09954-z     |
| 57 Kling K, Harder T, Younger Z, Burchard G, Schmidt-Chanasit J, Wichmann O. Vaccination against Japanese encephalitis with IC51: Systematic review on immunogenicity, duration of protection, and safety. <i>J Travel Med</i> . 2020 Feb;27(2):taaa016.                                                                           | doi:10.1093/jtm/taaa016            |
| 58 Koenig C, Schneider C, Morgan JE, Ammann RA, Sung L, Phillips B. Association of time to antibiotics and clinical outcomes in patients with fever and neutropenia during chemotherapy for cancer: A systematic review. <i>Support Care Cancer</i> . 2020 Jul;28(3):1369–83.                                                      | doi:10.1007/s00520-019-04961-4     |
| 59 Kokkinidis DG, Arfaras-Melainis A, Giannopoulos S, Katsaros I, Jawaid O, Jonnalagadda AK, et al. Statin therapy for reduction of cardiovascular and limb-related events in critical limb ischemia: A systematic review and meta-analysis. <i>Vasc Med</i> . 2020 Jan;25(2):106–17.                                              | doi:10.1177/1358863X19894055       |
| 60 Kolding L, Eken H, Uldbjerg N. Drug exposure during pregnancy and fetal cardiac function - a systematic review. <i>J Perinat Med</i> . 2020 Mar;48(3):199–208.                                                                                                                                                                  | doi:10.1515/jpm-2019-0402          |
| 61 Kowalewski M, Raffa GM, Zielinski K, Alanazi M, Gilbers M, Heuts S, et al. The impact of Centre's heart transplant status and volume on in-hospital outcomes following extracorporeal membrane oxygenation for refractory post-cardiotomy cardiogenic shock: A meta-analysis. <i>BMC Cardiovasc Disord</i> . 2020 Jan;20(1):10. | doi:10.1186/s12872-019-01317-y     |
| 62 Lam PPY, Du RN, Peng SM, McGrath CPJ, Yiu CKY. Oral health status of children and adolescents with autism spectrum disorder: A systematic review of case-control studies and meta-analysis. <i>Autism</i> . 2020 Jan;24(5):136236131987733.                                                                                     | doi:10.1177/1362361319877337       |
| 63 Leach MJ, Jones M, Bressington D, Jones A, Nolan F, Muyambi K, et al. The association between community mental health nursing and hospital admissions for people with serious mental illness: A systematic review. <i>Syst Rev</i> . 2020;9(1):35.                                                                              | doi:10.1186/s13643-020-01292-y     |
| 64 Lee SI, Patel M, Dutton B, Weng S, Luveta J, Qureshi N. Effectiveness of interventions to identify and manage patients with familial cancer risk in primary care: A systematic review. <i>J Community Genet</i> . 2020 May;11(1):73–83.                                                                                         | doi:10.1007/s12687-019-00419-6     |
| 65 Lee H, Ryu K, Sohn Y, Kim J, Suh GY, Kim E. Impact on patient outcomes of pharmacist participation in multidisciplinary critical care teams: A systematic review and meta-analysis. <i>Crit Care Med</i> . 2020 Sep;47(9):1243–50.                                                                                              | doi:10.1097/CCM.0000000000003830   |
| 66 Lee JA, Levy DA, Patel KG, Brennan E, Oyer SL. Hair transplantation in frontal fibrosing alopecia and lichen planopilaris: A systematic review. <i>Laryngoscope</i> . 2020 Feb;131(1):59–66.                                                                                                                                    | doi:10.1002/lary.28551             |
| 67 Liu S, Gnjudic D, Nguyen J, Penn J. Effectiveness of interventions on the appropriate use of opioids for noncancer pain among hospital inpatients: A systematic review. <i>Br J Clin Pharmacol</i> . 2020 Jan;86(2):210–43.                                                                                                     | doi:10.1111/bcp.14203              |

| Reference                                                                                                                                                                                                                                                                                                           | DOI                             |
|---------------------------------------------------------------------------------------------------------------------------------------------------------------------------------------------------------------------------------------------------------------------------------------------------------------------|---------------------------------|
| 68 Louwers A, Warnink-Kavelaars J, Daams J, Beelen A. Effects of upper extremity surgery on activities and participation of children with cerebral palsy: A systematic review. <i>Dev Med Child Neurol.</i> 2020 Jul;62(1):21–7.                                                                                    | doi:10.1111/dmcn.14315          |
| 69 Lu J, Lu Y, Xun Y, Chen F, Wang S, Cao S. Impact of endourological procedures with or without double-J stent on sexual function: A systematic review and meta-analysis. <i>BMC Urol.</i> 2020;20(1):13.                                                                                                          | doi:10.1186/s12894-020-0582-1   |
| 70 Lussier ME, Evans HJ, Wright EA, Gionfriddo MR. The impact of community pharmacist involvement on transitions of care: A systematic review and meta-analysis. <i>J Am Pharm Assoc.</i> 2020 Jan;60(1):153–162.e5.                                                                                                | doi:10.1016/j.japh.2019.07.002  |
| 71 Ma Z, Dhir P, Perrier L, Bayley M, Munce S. The impact of vocational interventions on vocational outcomes, quality of life, and community integration in adults with childhood onset disabilities: A systematic review. <i>J Occup Rehabil.</i> 2020 Sep;30(1):1–21.                                             | doi:10.1007/s10926-019-09854-1  |
| 72 Mac Giolla Phadraig C, Asimakopoulou K, Daly B, Fleischmann I, Nunn J. Nonpharmacological techniques to support patients with intellectual developmental disorders to receive dental treatment: A systematic review of behavior change techniques. <i>Spec Care Dentist.</i> 2020 Nov;40(1):10–25.               | doi:10.1111/scd.12434           |
| 73 Manohar N, Hayen A, Fahey P, Arora A. Obesity and dental caries in early childhood: A systematic review and meta-analyses. <i>Obes Rev.</i> 2020 Nov;21(3):e12960.                                                                                                                                               | doi:10.1111/obr.12960           |
| 74 Martha BA, Vacchi CO, Fattori RA, Macagnan FE. Effect of physical exercise on the functional capacity of children and adolescents submitted to transplantation of hematopoietic stem cells - a systematic review with meta-analysis. <i>J Child Health Care.</i> 2020 Feb;25(1):18–30.                           | doi:10.1177/1367493520903626    |
| 75 Martin J, Viprey M, Castagne B, Merle B, Giroudon C, Chapurlat R, et al. Interventions to improve osteoporosis care: A systematic review and meta-analysis. <i>Osteoporos Int.</i> 2020 Jan;31(3):429–46.                                                                                                        | doi:10.1007/s00198-020-05308-0  |
| 76 Martson AG, Bakker M, Blokzijl H, Verschuuren EAM, Berger SP, Span LFR, et al. Exploring failure of antimicrobial prophylaxis and pre-emptive therapy for transplant recipients: A systematic review. <i>BMJ Open.</i> 2020 Jan;10(1):e034940.                                                                   | doi:10.1136/bmjopen-2019-034940 |
| 77 Mecenas P, Espinosa DG, Cardoso PC, Normando D. Stainless steel or titanium mini-implants? A systematic review. <i>Angle Orthod.</i> 2020;90(4):587–97.                                                                                                                                                          | doi:10.2319/081619-536.1        |
| 78 Meuwese CL, Haan M de, Zwetsloot PP, Braithwaite S, Ramjankhan F, Heijden J van der, et al. The hemodynamic effect of different left ventricular unloading techniques during veno-arterial extracorporeal life support: A systematic review and meta-analysis. <i>Perfusion.</i> 2020 Jan;35(7):026765911989747. | doi:10.1177/0267659119897478    |
| 79 Mian H, Mian OS, Rochweg B, Foley R, Wildes TM. Autologous stem cell transplant in older patients (age 65) with newly diagnosed multiple myeloma: A systematic review and meta-analysis. <i>J Geriatr Oncol.</i> 2020 Jan;11(1):93–9.                                                                            | doi:10.1016/j.jgo.2019.05.014   |
| 80 Moda LB, Silva Barros ALC da, Fagundes NCF, Normando D, Maia LC, Anjos Mendes SM dos. Lower fixed retainers: Bonded on all teeth or only on canines? A systematic review. <i>Angle Orthod.</i> 2020 Sep;90(1):125–43.                                                                                            | doi:10.2319/013019-63.1         |
| 81 Mujcic A, Blankers M, Bommel J, Boon B, Berman AH, Verdonck-de Leeuw IM, et al. The effectiveness of distance-based interventions for smoking cessation and alcohol moderation among cancer survivors: A meta-analysis. <i>Psychooncology.</i> 2020;29:49–60.                                                    | doi:10.1002/pon.5261            |
| 82 Muñoz Aguilera E, Suvan J, Buti J, Czesnikiewicz-Guzik M, Barbosa Ribeiro A, Orlandi M, et al. Periodontitis is associated with hypertension: A systematic review and meta-analysis. <i>Cardiovasc Res.</i> 2020 Sep;116(1):28–39.                                                                               | doi:10.1093/cvr/cvz201          |
| 83 Né YGS, Martins BV, Castro MML, Alvarenga MOP, Fagundes NCF, Magno MB, et al. Is nutritional intervention an improvement factor in the management of periodontitis? A systematic review. <i>Clin Nutr.</i> 2020;39(9):2639–46.                                                                                   | doi:10.1016/j.clnu.2019.12.016  |

| Reference                                                                                                                                                                                                                                                                                                                                            | DOI                                 |
|------------------------------------------------------------------------------------------------------------------------------------------------------------------------------------------------------------------------------------------------------------------------------------------------------------------------------------------------------|-------------------------------------|
| 84 Nizam MA, Alvi AS, Hamdani MM, Lalani AS, Sibtain SA, Bhangar NA. Efficacy of double versus single phototherapy in treatment of neonatal jaundice: A meta-analysis. <i>Eur J Pediatr.</i> 2020 Jan;179(6):865–74.                                                                                                                                 | doi:10.1007/s00431-020-03583-x      |
| 85 Nylander Vujovic S, Nava C, Johansson M, Bruschetini M. Confounding biases in studies on early- versus late-caffeine in preterm infants: A systematic review. <i>Pediatr Res.</i> 2020 Jan;88(3):357–64.                                                                                                                                          | doi:10.1038/s41390-020-0757-1       |
| 86 Okolie C, Wood S, Hawton K, Kandalama U, Glendenning AC, Dennis M, et al. Means restriction for the prevention of suicide by jumping. <i>Cochrane Database Syst Rev.</i> 2020 Feb;(2).                                                                                                                                                            | doi:10.1002/14651858.CD013543       |
| 87 Omori Y, Lang NP, Botticelli D, Papageorgiou SN, Baba S. Biological and mechanical complications of angulated abutments connected to fixed dental prostheses: A systematic review with meta-analysis. <i>J Oral Rehabil.</i> 2020;47:101–11.                                                                                                      | doi:10.1111/joor.12877              |
| 88 Ordean A, Kim G. Cannabis use during lactation: Literature review and clinical recommendations. <i>J Obstet Gynaecol Can.</i> 2020;42(10):1248–53.                                                                                                                                                                                                | doi:10.1016/j.jogc.2019.11.003      |
| 89 Oteri V, Occhipinti F, Gribaudo G, Marastoni F, Chisari E. Integration of ultrasound in medical school: Effects on physical examination skills of undergraduates. <i>Med Sci Educ.</i> 2020 Feb;30(1):417–27.                                                                                                                                     | doi:10.1007/s40670-020-00921-4      |
| 90 Palmowski J, Reichel T, Bolau TK, Krger K. The effect of acute running and cycling exercise on T cell apoptosis in humans: A systematic review. <i>Scand J Immunol.</i> 2020 Nov;91(2):e12834.                                                                                                                                                    | doi:10.1111/sji.12834               |
| 91 Podlasek A, Al Sultan AA, Assis Z, Kashani N, Goyal M, Almekhlafi MA. Outcome of intracranial flow diversion according to the antiplatelet regimen used: A systematic review and meta-analysis. <i>J Neurointerv Surg.</i> 2020;12:148–55.                                                                                                        | doi:10.1136/neurintsurg-2019-014996 |
| 92 Rayner TA, Harrison S, Rival P, Mahoney DE, Caputo M, Angelini GD, et al. Minimally invasive versus conventional surgery of the ascending aorta and root: A systematic review and meta-analysis. <i>Eur J Cardiothorac Surg.</i> 2020 Jun;57(1):8–17.                                                                                             | doi:10.1093/ejcts/ezz177            |
| 93 Rhodes RE, Baranova M, Christian H, Westgarth C. Increasing physical activity by four legs rather than two: Systematic review of dog-facilitated physical activity interventions. <i>Br J Sports Med.</i> 2020 Jan;54(20):1202–7.                                                                                                                 | doi:10.1136/bjsports-2019-101156    |
| 94 Rodrigues BS, David C, Costa J, Ferreira JJ, Pinto FJ, Caldeira D. Influenza vaccination in patients with heart failure: A systematic review and meta-analysis of observational studies. <i>Heart.</i> 2020 Aug;106(5):350–7.                                                                                                                     | doi:10.1136/heartjnl-2019-315193    |
| 95 Rys P, Borys S, Hohendorff J, Zapala A, Witek P, Monica M, et al. NPWT in diabetic foot wounds: A systematic review and meta-analysis of observational studies. <i>Endocrine.</i> 2020;68(1):44–55.                                                                                                                                               | doi:10.1007/s12020-019-02164-9      |
| 96 Sagae VMT, Ribeiro IB, Moura DTH de, Brunaldi VO, Logiudice FP, Funari MP, et al. Endoscopic submucosal dissection versus transanal endoscopic surgery for the treatment of early rectal tumor: A systematic review and meta-analysis. <i>Surg Endosc.</i> 2020;34:1025–34.                                                                       | doi:10.1007/s00464-019-07271-2      |
| 97 Schimmack S, Kaiser J, Probst P, Kalkum E, Diener MK, Strobel O. Meta-analysis of $\alpha$ -blockade versus no blockade before adrenalectomy for pheochromocytoma. <i>Br J Surg.</i> 2020;107(2):e102–8.                                                                                                                                          | doi:10.1002/bjs.11348               |
| 98 Schmidt R, Rodrigues CG, Schmidt KH, Irigoyen MCC. Safety and efficacy of baroreflex activation therapy for heart failure with reduced ejection fraction: A rapid systematic review. <i>ESC Heart Fail.</i> 2020 Jan;7(1):3–14.                                                                                                                   | doi:10.1002/ehf2.12543              |
| 99 Schutyser W, Cruyt L, Vulsteke JB, Lenaerts JL, De Langhe E. The role of high-resolution manometry in the assessment of upper gastrointestinal involvement in systemic sclerosis: A systematic review. <i>Clin Rheumatol.</i> 2020;39:149–57.                                                                                                     | doi:10.1007/s10067-019-04794-w      |
| 100 Sennesael A-L, Krug B, Sneyers B, Spinewine A. Do computerized clinical decision support systems improve the prescribing of oral anticoagulants? A systematic review. <i>Thromb Res.</i> 2020 Mar;187:79–87.                                                                                                                                     | doi:10.1016/j.thromres.2019.12.023  |
| 101 Sfakianoudis K, Pantos K, Grigoriadis S, Rapani A, Maziotis E, Tsioulou P, et al. What is the true place of a double stimulation and double oocyte retrieval in the same cycle for patients diagnosed with poor ovarian reserve? A systematic review including a meta-analytical approach. <i>J Assist Reprod Genet.</i> 2020 Dec;37(1):181–204. | doi:10.1007/s10815-019-01638-z      |

| Reference                                                                                                                                                                                                                                                                                                                             | DOI                               |
|---------------------------------------------------------------------------------------------------------------------------------------------------------------------------------------------------------------------------------------------------------------------------------------------------------------------------------------|-----------------------------------|
| 102 Sideris A, Holmes TR, Cumming B, Havas T. A systematic review and meta-analysis of predictors of airway intervention in adult epiglottitis. <i>Laryngoscope</i> . 2020;130:465–73.                                                                                                                                                | doi:10.1002/lary.28076            |
| 103 Singh AD, Maitra S, Singh N, Tyagi P, Ashraf A, Kumar R, et al. Systematic review with meta-analysis: Impact of baseline resistance-associated substitutions on the efficacy of glecaprevir/pibrentasvir among chronic hepatitis C patients. <i>Aliment Pharmacol Ther</i> . 2020 Jan;51(5):490–504.                              | doi:10.1111/apt.15633             |
| 104 Sletvold H, Sagmo LAB, Torheim EA. Impact of pictograms on medication adherence: A systematic literature review. <i>Patient Educ Couns</i> . 2020;103(6):1095–103.                                                                                                                                                                | doi:10.1016/j.pec.2019.12.018     |
| 105 Sterpetti AV, Costi U, D’Ermo G. National statistics about resection of the primary tumor in asymptomatic patients with Stage IV colorectal cancer and unresectable metastases. Need for improvement in data collection. A systematic review with meta-analysis. <i>Surg Oncol</i> . 2020 Jun;33:11–8.                            | doi:10.1016/j.suronc.2019.12.004  |
| 106 Su S-F, Wu M-S, Yeh W-T, Liao Y-C. Effects of lumbar fusion surgery with ISOBAR devices versus posterior lumbar interbody fusion surgery on pain and disability in patients with lumbar degenerative diseases: A meta-analysis. <i>J Invest Surg</i> . 2020;33:79–93.                                                             | doi:10.1080/08941939.2018.1472318 |
| 107 Suarez S, Conde-Agudelo A, Borovac-Pinheiro A, Suarez-Rebling D, Eckardt M, Theron G, et al. Uterine balloon tamponade for the treatment of postpartum hemorrhage: A systematic review and meta-analysis. <i>Am J Obstet Gynecol</i> . 2020 Apr;222(4):293.e1–52.                                                                 | doi:10.1016/j.ajog.2019.11.1287   |
| 108 Tadount F, Doyon-Plourde P, Rafferty E, MacDonald S, Sadarangani M, Quach C. Is there a difference in the immune response, efficacy, effectiveness and safety of seasonal influenza vaccine in males and females? - a systematic review. <i>Vaccine</i> . 2020 Jan;38(3):444–59.                                                  | doi:10.1016/j.vaccine.2019.10.091 |
| 109 Tan SM, Han E, Quek RYC, Singh SR, Gea-Snchez M, Legido-Quigley H. A systematic review of community nursing interventions focusing on improving outcomes for individuals exhibiting risk factors of cardiovascular disease. <i>J Adv Nurs</i> . 2020 Oct;76(1):47–61.                                                             | doi:10.1111/jan.14218             |
| 110 Tlapa D, Zepeda-Lugo CA, Tortorella GL, Baez-Lopez YA, Limon-Romero J, Alvarado-Iniesta A, et al. Effects of lean health-care on patient flow: A systematic review. <i>Value Health</i> . 2020 Feb;23(2):260–73.                                                                                                                  | doi:10.1016/j.jval.2019.11.002    |
| 111 Triantafyllou T, Olson MT, Theodorou D, Schizas D, Singhal S. Enhanced recovery pathways vs standard care pathways in esophageal cancer surgery: Systematic review and meta-analysis. <i>Esophagus</i> . 2020 Jan;17(2):100–12.                                                                                                   | doi:10.1007/s10388-020-00718-9    |
| 112 Tsaousi G, Pourzitaki C, Siafis S, Kyrgidis A, Grosomanidis V, Kouvelas D, et al. Levetiracetam as preventive treatment in adults with migraine: An up-to-date systematic review and quantitative meta-analysis. <i>Eur J Clin Pharmacol</i> . 2020 Nov;76(2):161–74.                                                             | doi:10.1007/s00228-019-02790-2    |
| 113 Tseng M, Vellayappan B, Choong R, Appalanaido GK, Soon YY. Post mastectomy radiotherapy for elderly patients with intermediate risk (T1-2N1 or T3N0) breast cancer: A systematic review and meta-analysis. <i>Transl Cancer Res</i> . 2020 Jan;9(S1):S23–8.                                                                       | doi:10.21037/tcr.2019.07.23       |
| 114 Tzoumas A, Giannopoulos S, Texakalidis P, Charisis N, Machinis T, Koullias GJ. Synchronous versus staged carotid endarterectomy and coronary artery bypass graft for patients with concomitant severe coronary and carotid artery stenosis: A systematic review and meta-analysis. <i>Ann Vasc Surg</i> . 2020 Feb;63:427–438.e1. | doi:10.1016/j.avsg.2019.09.007    |
| 115 Veloso A, Vicente SG, Filipe MG. Effectiveness of cognitive training for school-aged children and adolescents with Attention Deficit/Hyperactivity Disorder: A systematic review. <i>Front Psychol</i> . 2020 Jan;10:2983.                                                                                                        | doi:10.3389/fpsyg.2019.02983      |



| Reference                                                                                                                                                                                                                                                                                                                  | DOI                               |
|----------------------------------------------------------------------------------------------------------------------------------------------------------------------------------------------------------------------------------------------------------------------------------------------------------------------------|-----------------------------------|
| 116 Vygen-Bonnet S, Hellenbrand W, Garbe E, Von Kries R, Bogdan C, Heininger U, et al. Safety and effectiveness of acellular pertussis vaccination during pregnancy: A systematic review. <i>BMC Infect Dis.</i> 2020 Feb;20(1):136.                                                                                       | doi:10.1186/s12879-020-4824-3     |
| 117 Wang K-W, Ladhani S, Empringham B, Portwine C, Fleming A, Banfield L, et al. Bariatric interventions in obesity treatment and prevention in pediatric acute lymphoblastic leukemia: A systematic review and meta-analysis. <i>Cancer Metastasis Rev.</i> 2020 Jan;39(1):79–90.                                         | doi:10.1007/s10555-020-09849-y    |
| 118 Wiseman-Hakes C, Ryu H, Lightfoot D, Kukreja G, Colantonio A, Matheson FI. Examining the efficacy of communication partner training for improving communication interactions and outcomes for individuals with traumatic brain injury: A systematic review. <i>Arch Rehabil Res Clin Transl.</i> 2020 Mar;2(1):100036. | doi:10.1016/j.arrct.2019.100036   |
| 119 Wong CK, O’Rielly CM, Teitge BD, Sutherland RL, Farquharson S, Ghosh M, et al. The characteristics and effectiveness of interventions for frequent emergency department utilizing patients with chronic non-cancer pain: A systematic review. Asher S, editor. <i>Acad Emerg Med.</i> 2020 Mar;27(8):742–52.           | doi:10.1111/acem.13934            |
| 120 Young I, Waddell LA, Wilhelm BJ, Greig J. A systematic review and meta-regression of single group, pre-post studies evaluating food safety education and training interventions for food handlers. <i>Food Res Int.</i> 2020 Feb;128:108711.                                                                           | doi:10.1016/j.foodres.2019.108711 |
| 121 Zha L, Pan L, Guo J, French N, Villanueva EV, Tefsen B. Effectiveness and safety of high dose tigecycline for the treatment of severe infections: A systematic review and meta-analysis. <i>Adv Ther.</i> 2020 Jan;37(3):1049–64.                                                                                      | doi:10.1007/s12325-020-01235-y    |
| 122 Zhao B, Lv W, Mei D, Luo R, Bao S, Huang B, et al. Comparison of short-term surgical outcome between 3D and 2D laparoscopy surgery for gastrointestinal cancer: A systematic review and meta-analysis. <i>Langenbecks Arch Surg.</i> 2020 Jan;405(1):1–2.                                                              | doi:10.1007/s00423-020-01853-8    |
| 123 Zittermann A, Pilz S, Berthold HK. Serum 25-hydroxyvitamin D response to vitamin D supplementation in infants: A systematic review and meta-analysis of clinical intervention trials. <i>Eur J Nutr.</i> 2020 Feb;59(1):359–69.                                                                                        | doi:10.1007/s00394-019-01912-x    |
| 124 Zymperdikas VF, Yavropoulou MP, Kaklamanos EG, Papadopoulos MA. Effects of systematic bisphosphonate use in patients under orthodontic treatment: A systematic review. <i>Eur J Orthod.</i> 2020 Apr;42:60–71.                                                                                                         | doi:10.1093/ejo/cjz021            |

## Supplementary Table 2: Publications excluded after full-text screening

| Reference                                                                                                                                                                                                                                                                                 | DOI                                  | Reason for exclusion    |
|-------------------------------------------------------------------------------------------------------------------------------------------------------------------------------------------------------------------------------------------------------------------------------------------|--------------------------------------|-------------------------|
| 1 Agarwal R, Liao JM, Gupta A, Navathe AS. The impact of bundled payment on health care spending, utilization, and quality: A systematic review. <i>Health Aff (Millwood)</i> . 2020 Jan;39(1):50–7.                                                                                      | doi:10.1377/hlthaff.2019.00784       | Did not use ROBINS-I    |
| 2 Albanese E, Bütikofer L, Armijo-Olivo S, Ha C, Egger M. Construct validity of the Physiotherapy Evidence Database (PEDro) quality scale for randomized trials: Item response theory and factor analyses. <i>Res Synth Meth</i> . 2020 Jan;11(2):227–36.                                 | doi:10.1002/jrsm.1385                | Not a systematic review |
| 3 Avgerinos KI, Egan JM, Mattson MP, Kapogiannis D. Medium chain triglycerides induce mild ketosis and may improve cognition in Alzheimer’s disease. A systematic review and meta-analysis of human studies. <i>Ageing Res Rev</i> . 2020 Mar;58:101001.                                  | doi:10.1016/j.arr.2019.101001        | Did not use ROBINS-I    |
| 4 Babic A, Vuka I, Saric F, Prolosic I, Slapnicar E, Cavar J, et al. Overall bias methods and their use in sensitivity analysis of Cochrane reviews were not consistent. <i>J Clin Epidemiol</i> . 2020 Mar;119:57–64.                                                                    | doi:10.1016/j.jclinepi.2019.11.008   | Not a systematic review |
| 5 Besomi M, Maclachlan L, Mellor R, Vicenzino B, Hodges PW. Tensor fascia latae muscle structure and activation in individuals with lower limb musculoskeletal conditions: A systematic review and meta-analysis. <i>Sports Med</i> . 2020 Jan;50(5):965–85.                              | doi:10.1007/s40279-019-01251-1       | Did not use ROBINS-I    |
| 6 Blakeway H, Van-de-Velde V, Allen VB, Kravvas G, Palla L, Page MJ, et al. What is the evidence for interactions between filaggrin null mutations and environmental exposures in the aetiology of atopic dermatitis? A systematic review. <i>Br J Dermatol</i> . 2020 Feb;183(3):443–51. | doi:10.1111/bjd.18778                | Did not use ROBINS-I    |
| 7 Brauers L, Rameckers E, Severijns D, Feys P, Smeets R, Klingels K. Measuring motor fatigability in the upper limbs in individuals with neurologic disorders: A systematic review. <i>Arch Phys Med Rehabil</i> . 2020 May;101(5):907–16.                                                | doi:10.1016/j.apmr.2019.11.015       | No full text available  |
| 8 Cao S, Jones M, Tooth L, Mishra GD. History of premenstrual syndrome and development of postpartum depression: A systematic review and meta-analysis. <i>J Psychiatr Res</i> . 2020 Feb;121:82–90.                                                                                      | doi:10.1016/j.jpsychires.2019.11.010 | Did not use ROBINS-I    |
| 9 Cohen JA, Trojano M, Mowry EM, Uitdehaag BMJ, Reingold SC, Marrie RA. Leveraging real-world data to investigate multiple sclerosis disease behavior, prognosis, and treatment. <i>Mult Scler J</i> . 2020 Nov;26(1):23–37.                                                              | doi:10.1177/1352458519892555         | Not a systematic review |
| 10 Dhiman P, Lee H, Kirtley S, Collins GS. A systematic review showed more consideration is needed when conducting nonrandomized studies of interventions. <i>J Clin Epidemiol</i> . 2020 Jan;117:99–108.                                                                                 | doi:10.1016/j.jclinepi.2019.09.027   | Methodological          |
| 11 Dimitropoulos K, Gravas S. Mind the gap: Management of benign prostatic obstruction (BPO) surgical candidates on antithrombotics. <i>World J Urol</i> . 2020;38:247–8.                                                                                                                 | doi:10.1007/s00345-018-02625-2       | Not a systematic review |
| 12 Ewald H, Ioannidis JPA, Ladanie A, Mc Cord K, Bucher HC, Hemkens LG. Nonrandomized studies using causal-modeling may give different answers than RCTs: A meta-epidemiological study. <i>J Clin Epidemiol</i> . 2020 Feb;118:29–41.                                                     | doi:10.1016/j.jclinepi.2019.10.012   | Did not use ROBINS-I    |
| 13 Franklin JM, Glynn RJ, Suissa S, Schneeweiss S. Emulation differences vs. Biases when calibrating real-world evidence findings against randomized controlled trials. <i>Clin Pharmacol Ther</i> . 2020 Feb;107(4):735–7.                                                               | doi:10.1002/cpt.1793                 | Not a systematic review |

| Reference                                                                                                                                                                                                                                                                                 | DOI                                | Reason for exclusion    |
|-------------------------------------------------------------------------------------------------------------------------------------------------------------------------------------------------------------------------------------------------------------------------------------------|------------------------------------|-------------------------|
| 14 Haby MM, Sosa Leon LA, Lucianez A, Nicholls RS, Reveiz L, Donadeu M. Systematic review of the effectiveness of selected drugs for preventive chemotherapy for <i>Taenia solium</i> taeniasis. Ozkan AT, editor. <i>PLoS Negl Trop Dis</i> . 2020 Jan;14(1):e0007873.                   | doi:10.1371/journal.pntd.0007873   | Did not use ROBINS-I    |
| 15 Howden CW, Korvick JA, Harinstein L, Weissfeld J, Moayyedi P, Vakil N, et al. Controversies around measuring drug toxicity: US Food and Drug Administration and gastrointestinal perspectives. <i>Gastroenterology</i> . 2020 Jan;158(1):22–7.                                         | doi:10.1053/j.gastro.2019.10.014   | Not a systematic review |
| 16 Huddart S, Svadzian A, Nafade V, Satyanarayana S, Pai M. Tuberculosis case fatality in India: A systematic review and meta-analysis. <i>BMJ Glob Health</i> . 2020;5(1):e002080.                                                                                                       | doi:10.1136/bmjgh-2019-002080      | Did not use ROBINS-I    |
| 17 Hughes SL, Bolotin S, Khan S, Li Y, Johnson C, Friedman L, et al. The effect of time since measles vaccination and age at first dose on measles vaccine effectiveness - a systematic review. <i>Vaccine</i> . 2020;38:460–9.                                                           | doi:10.1016/j.vaccine.2019.10.090  | Did not use ROBINS-I    |
| 18 Jang M-A, Kim B, Lee YK. Reporting quality of diagnostic accuracy studies in laboratory medicine: Adherence to standards for reporting of diagnostic accuracy studies (STARD) 2015. <i>Ann Lab Med</i> . 2020;40:245–52.                                                               | doi:10.3343/alm.2020.40.3.274      | Did not use ROBINS-I    |
| 19 Lazzara EH, Keebler JR, Simonson RJ, Agarwala A, Lane-Fall MB. Navigating the challenges of performing anesthesia handoffs and conducting anesthesia handoff research. <i>Int Anesthesiol Clin</i> . 2020 Nov;58(1):32–7.                                                              | doi:10.1097/AIA.0000000000000260   | Not a systematic review |
| 20 Lee DJ, Yang W, Propst EJ, Rosenblatt SD, Hseu A, Wolter NE. Tracheo-innominate fistula in children: A systematic review of literature. <i>Laryngoscope</i> . 2020;130:217–24.                                                                                                         | doi:10.1002/lary.27765             | Did not use ROBINS-I    |
| 21 Manerkar K, Harding J, Conlon C, McKinlay C. Maternal gestational diabetes and infant feeding, nutrition and growth: A systematic review and meta-analysis. <i>Br J Nutr</i> . 2020 Jan;123(11):1201–15.                                                                               | doi:10.1017/S0007114520000264      | Did not use ROBINS-I    |
| 22 McNeil D, Provencher M, Wong IH. Arthroscopic anatomic glenoid reconstruction demonstrates its safety with short-term to medium-term results for anteroinferior shoulder instability: A systematic review. <i>J ISAKOS</i> . 2020;5:37–47.                                             | doi:10.1136/jisakos-2019-000388    | No full text available  |
| 23 Moskalewicz A, Oremus M. No clear choice between Newcastle-Ottawa Scale and appraisal tool for cross-sectional studies to assess methodological quality in cross-sectional studies of health-related quality of life and breast cancer. <i>J Clin Epidemiol</i> . 2020 Apr;120:103–94. | doi:10.1016/j.jclinepi.2019.12.013 | Did not use ROBINS-I    |
| 24 Noly P-E, Ben Ali W, Lamarche Y, Carrier M. Status, indications, and use of cardiac replacement therapy in the era of multimodal mechanical approaches to circulatory support: A scoping review. <i>Can J Cardiol</i> . 2020;36:261–9.                                                 | doi:10.1016/j.cjca.2019.11.027     | Not a systematic review |
| 25 Puhl RM. What words should we use to talk about weight? A systematic review of quantitative and qualitative studies examining preferences for weight-related terminology. <i>Obes Rev</i> . 2020 Feb;21(6):e13008.                                                                     | doi:10.1111/obr.13008              | Did not use ROBINS-I    |
| 26 Radke EG, Braun JM, Nachman RM, Cooper GS. Phthalate exposure and neurodevelopment: A systematic review and meta-analysis of human epidemiological evidence. <i>Environ Int</i> . 2020;137:105408.                                                                                     | doi:10.1016/j.envint.2019.105408   | Did not use ROBINS-I    |
| 27 Sacco R, Shah S, Leeson R, Moraschini V, Almeida Barros Mouro CF de, Akintola O, et al. Osteonecrosis and osteomyelitis of the jaw associated with tumour necrosis factor-alpha (TNF- $\alpha$ ) inhibitors: A systematic review. <i>Br J Oral Maxillofac Surg</i> . 2020;58:25–33.    | doi:10.1016/j.bjoms.2019.09.023    | Did not use ROBINS-I    |

| Reference                                                                                                                                                                                                                                                             | DOI                                  | Reason for exclusion    |
|-----------------------------------------------------------------------------------------------------------------------------------------------------------------------------------------------------------------------------------------------------------------------|--------------------------------------|-------------------------|
| 28 Schardong J, Stein C, Della Mea Plentz R. Neuromuscular electrical stimulation in chronic kidney failure: A systematic review and meta-analysis. <i>Arch Phys Med Rehabil.</i> 2020;101(4):700–11.                                                                 | doi:10.1016/j.apmr.2019.11.008       | No full text available  |
| 29 Thaivalappil A, Young I, Paco C, Jeyapalan A, Papadopoulos A. Food safety and the older consumer: A systematic review and meta-regression of their knowledge and practices at home. <i>Food Control.</i> 2020 Jan;107:106782.                                      | doi:10.1016/j.foodcont.2019.106782   | Did not use ROBINS-I    |
| 30 Tocalini P, Vicente A, Amoza RL, Garca Reid C, Cura AJ, Tozzi WA, et al. Association between obesity and mortality in adult patients receiving invasive mechanical ventilation: A systematic review and meta-analysis. <i>Med Intensiva.</i> 2020 Jan;44(1):18–26. | doi:10.1016/j.medin.2018.07.006      | Did not use ROBINS-I    |
| 31 Van Grootven B, Mendelson DA, Deschodt M. Impact of geriatric co-management programmes on outcomes in older surgical patients: Update of recent evidence. <i>Curr Opin Anaesthesiol.</i> 2020 Feb;33(1):114–21.                                                    | doi:10.1097/ACO.0000000000000815     | Not a systematic review |
| 32 Wu M-Y, Lo W-C, Chao C-T, Wu M-S, Chiang C-K. Association between air pollutants and development of chronic kidney disease: A systematic review and meta-analysis. <i>Sci Total Environ.</i> 2020 Mar;706:135522.                                                  | doi:10.1016/j.scitotenv.2019.135522  | Did not use ROBINS-I    |
| 33 Zuckier LS. Evidence-based medicine in the domain of nuclear medicine, the fifty-year view. <i>Semin Nucl Med.</i> 2020 Jan;50(1):110–4.                                                                                                                           | doi:10.1053/j.semnuclmed.2019.07.007 | Not a systematic review |

**Supplementary Table 3: Characteristics of the included systematic reviews**

|    | First author | Type of intervention             | Included studies |     |       | Extracted<br>RoB ratings | MA? | Funding                   | Competing<br>interests | AMSTAR 2<br>confidence rating |
|----|--------------|----------------------------------|------------------|-----|-------|--------------------------|-----|---------------------------|------------------------|-------------------------------|
|    |              |                                  | NRS              | RCT | Total |                          |     |                           |                        |                               |
| 1  | Agnelli      | Non-interventional               | 105              | 19  | 124   | 107                      | Yes | Industry                  | Industry               | Critically low                |
| 2  | Alshafei     | Clinical intervention (surgical) | 4                | 2   | 6     | 4                        | Yes | None                      | None                   | Critically low                |
| 3  | Arn          | Clinical intervention (surgical) | 18               | 11  | 29    | 5                        | No  | Not reported              | None                   | Critically low                |
| 4  | Baker        | Clinical intervention (other)    | 11               | 19  | 30    |                          | No  | None                      | None                   | Critically low                |
| 5  | Balla        | Clinical intervention (surgical) | 28               |     | 28    | 28                       | No  | Not reported              | None                   | Critically low                |
| 6  | Bang         | Clinical intervention (surgical) | 8                |     | 8     | 8                        | Yes | Government                | None                   | Critically low                |
| 7  | Belachew     | Public health intervention       | 11               |     | 11    |                          | Yes | Not reported              | None                   | Critically low                |
| 8  | Belk         | Clinical intervention (surgical) | 11               | 1   | 12    | 12                       | Yes | Not reported              | None                   | Critically low                |
| 9  | Bellos       | Non-interventional               | 17               |     | 17    | 17                       | Yes | None                      | None                   | Low                           |
| 10 | Bezczeky     | Non-clinical intervention        | 14               | 15  | 29    | 13                       | Yes | Government                | Academic               | Low                           |
| 11 | Brennan      | Environmental exposure           | 27               |     | 27    | 18                       | Yes | Government                | None                   | High                          |
| 12 | Brouwer      | Clinical intervention (other)    | 4                | 7   | 11    | 4                        | Yes | Not reported              | None                   | Critically low                |
| 13 | Cardoso      | Clinical intervention (surgical) | 6                | 1   | 7     |                          | No  | None                      | None                   | High                          |
| 14 | Carrier      | Clinical intervention (other)    | 29               | 7   | 36    | 29                       | Yes | Foundation/NGO            | None                   | Moderate                      |
| 15 | Carter       | Clinical intervention (other)    | 24               |     | 24    | 24                       | No  | Multiple (excl. industry) | Academic               | Low                           |
| 16 | Checucci (a) | Clinical intervention (surgical) | 10               |     | 10    | 7                        | No  | None                      | None                   | Critically low                |
| 17 | Checucci (b) | Clinical intervention (surgical) | 5                | 3   | 8     |                          | Yes | Not reported              | None                   | Critically low                |
| 18 | Chen         | Clinical intervention (drug)     | 7                | 5   | 12    | 7                        | Yes | None                      | None                   | Critically low                |
| 19 | Coates       | Non-interventional               | 62               | 6   | 68    | 46                       | No  | Multiple (excl. industry) | None                   | Moderate                      |
| 20 | Cutts        | Non-interventional               | 28               | 5   | 33    | 16                       | Yes | Government                | None                   | Critically low                |
| 21 | Daugaard     | Clinical intervention (other)    | 5                | 9   | 14    | 9                        | No  | Multiple (excl. industry) | Industry               | Low                           |
| 22 | Davidson     | Clinical intervention (other)    | 27               |     | 27    | 27                       | No  | Not reported              | None                   | Low                           |
| 23 | DeNicola     | Public health intervention       | 8                | 39  | 47    |                          | No  | Multiple (incl. industry) | Industry               | Low                           |
| 24 | Di Giuseppe  | Clinical intervention (other)    | 24               |     | 24    | 24                       | No  | Not reported              | None                   | Critically low                |
| 25 | Djade        | Non-interventional               | 6                |     | 6     | 6                        | No  | Not reported              | Not reported           | Critically low                |
| 26 | Djarv        | Clinical intervention (drug)     | 2                | 1   | 3     |                          | Yes | Foundation/NGO            | None                   | Critically low                |
| 27 | Falk Brekke  | Clinical intervention (other)    | 2                | 2   | 4     | 2                        | No  | None                      | Industry               | Low                           |
| 28 | Fang         | Non-interventional               | 12               |     | 12    | 12                       | Yes | Government                | None                   | Moderate                      |
| 29 | Ford         | Clinical intervention (other)    | 14               | 2   | 16    | 2                        | No  | None                      | None                   | Moderate                      |
| 30 | Frascella    | Public health intervention       | 2                | 9   | 11    |                          | No  | Industry                  | None                   | Low                           |
| 31 | Froggatt     | Environmental exposure           | 22               |     | 22    |                          | Yes | Government                | None                   | Low                           |
| 32 | Gagelmann    | Clinical intervention (other)    | 18               |     | 18    |                          | Yes | Not reported              | None                   | Critically low                |
| 33 | Gandolla     | Clinical intervention (other)    | 14               |     | 14    | 14                       | Yes | Foundation/NGO            | None                   | Critically low                |
| 34 | Garbazza     | Non-interventional               | 39               | 1   | 40    | 4                        | Yes | Government                | None                   | Critically low                |

MA: Meta-analysis. NRS: Non-randomised study. RCT: Randomised controlled trial. RoB: Risk of bias.

|    | First author | Type of intervention             | Included studies |     |       | Extracted   |     |                           | Competing interests | AMSTAR 2 confidence rating |
|----|--------------|----------------------------------|------------------|-----|-------|-------------|-----|---------------------------|---------------------|----------------------------|
|    |              |                                  | NRS              | RCT | Total | RoB ratings | MA? | Funding                   |                     |                            |
| 35 | Geierlehner  | Clinical intervention (surgical) | 32               |     | 32    | 7           | Yes | Government                | None                | Low                        |
| 36 | Gentile      | Non-interventional               | 14               |     | 14    |             | Yes | None                      | None                | Critically low             |
| 37 | Giannopoulos | Clinical intervention (surgical) | 5                |     | 5     | 5           | Yes | None                      | None                | Critically low             |
| 38 | Giles        | Clinical intervention (surgical) | 18               |     | 18    |             | Yes | None                      | None                | Critically low             |
| 39 | Gogou        | Clinical intervention (drug)     | 13               | 6   | 19    |             | No  | Not reported              | None                | Critically low             |
| 40 | Goldshtein   | Public health intervention       | 9                |     | 9     |             | No  | None                      | None                | Low                        |
| 41 | Gottlieb     | Clinical intervention (drug)     | 3                |     | 3     | 3           | Yes | None                      | None                | Moderate                   |
| 42 | Graham       | Non-interventional               | 21               |     | 21    |             | Yes | Multiple (excl. industry) | None                | Moderate                   |
| 43 | Guo          | Clinical intervention (drug)     | 13               | 1   | 14    | 11          | Yes | None                      | None                | Critically low             |
| 44 | Gupta        | Clinical intervention (other)    | 10               | 2   | 12    | 10          | Yes | Industry                  | Industry            | Critically low             |
| 45 | Hajibandeh   | Clinical intervention (surgical) | 5                | 4   | 9     |             | Yes | None                      | None                | Critically low             |
| 46 | Hajibandeh   | Clinical intervention (surgical) | 11               |     | 11    |             | Yes | Not reported              | None                | Low                        |
| 47 | Handel       | Environmental exposure           | 29               |     | 29    | 29          | Yes | Industry                  | Industry            | High                       |
| 48 | Hasperhoven  | Public health intervention       | 17               |     | 17    | 17          | Yes | None                      | Academic            | Low                        |
| 49 | Heesen       | Clinical intervention (other)    | 12               | 1   | 13    | 12          | Yes | None                      | None                | Low                        |
| 50 | Hsu          | Clinical intervention (drug)     | 4                | 8   | 12    | 4           | Yes | Academic                  | None                | Critically low             |
| 51 | Hu           | Clinical intervention (other)    | 14               | 5   | 19    |             | No  | Not reported              | None                | Moderate                   |
| 52 | Huang        | Clinical intervention (other)    | 7                | 11  | 18    | 7           | Yes | Multiple (excl. industry) | None                | Critically low             |
| 53 | Indarwati    | Non-interventional               | 26               | 6   | 32    | 7           | Yes | None                      | Industry            | Critically low             |
| 54 | Jassal       | Clinical intervention (drug)     | 34               | 4   | 38    | 35          | No  | None                      | None                | Moderate                   |
| 55 | Kamfose      | Clinical intervention (drug)     | 4                | 2   | 6     | 4           | No  | Government                | None                | Low                        |
| 56 | Karamini     | Clinical intervention (other)    | 1                | 3   | 4     | 1           | No  | Not reported              | None                | Critically low             |
| 57 | Kling        | Clinical intervention (drug)     | 17               | 15  | 32    | 25          | No  | None                      | Academic            | Low                        |
| 58 | Koenig       | Clinical intervention (drug)     | 13               |     | 13    | 13          | Yes | Government                | None                | Critically low             |
| 59 | Kokkinidis   | Clinical intervention (drug)     | 19               |     | 19    |             | Yes | None                      | Industry            | Low                        |
| 60 | Kolding      | Clinical intervention (drug)     | 25               | 7   | 32    | 27          | No  | None                      | None                | Low                        |
| 61 | Kowalewski   | Public health intervention       | 54               |     | 54    | 54          | Yes | None                      | None                | Critically low             |
| 62 | Lam          | Non-interventional               | 16               |     | 16    |             | Yes | None                      | None                | High                       |
| 63 | Leach        | Public health intervention       | 1                | 1   | 2     |             | No  | None                      | None                | Moderate                   |
| 64 | Lee (a)      | Public health intervention       | 1                | 2   | 3     | 1           | No  | Government                | Academic            | High                       |
| 65 | Lee (b)      | Public health intervention       | 13               | 1   | 14    | 13          | Yes | Other                     | None                | Low                        |
| 66 | Lee (c)      | Clinical intervention (surgical) | 13               |     | 13    |             | No  | None                      | None                | Critically low             |
| 67 | Liu          | Public health intervention       | 33               | 4   | 37    | 33          | No  | Government                | None                | Low                        |
| 68 | Louwers      | Clinical intervention (surgical) | 12               |     | 12    | 12          | No  | Not reported              | Not reported        | Low                        |
| 69 | Lu           | Clinical intervention (surgical) | 5                |     | 5     | 5           | Yes | Government                | None                | Critically low             |
| 70 | Lussier      | Public health intervention       | 13               | 23  | 36    | 6           | Yes | Foundation/NGO            | Academic            | Low                        |

MA: Meta-analysis. NRS: Non-randomised study. RCT: Randomised controlled trial. RoB: Risk of bias.

|     | First author        | Type of intervention             | Included studies |     |       | Extracted   |     |                           | Competing interests | AMSTAR 2 confidence rating |
|-----|---------------------|----------------------------------|------------------|-----|-------|-------------|-----|---------------------------|---------------------|----------------------------|
|     |                     |                                  | NRS              | RCT | Total | RoB ratings | MA? | Funding                   |                     |                            |
| 71  | Ma                  | Non-clinical intervention        | 14               | 3   | 17    | 14          | No  | Multiple (excl. industry) | None                | Moderate                   |
| 72  | Mac Giolla Phadraig | Clinical intervention (other)    | 22               | 1   | 23    | 10          | No  | None                      | None                | Moderate                   |
| 73  | Manohar             | Non-interventional               | 9                |     | 9     | 9           | Yes | Multiple (excl. industry) | None                | High                       |
| 74  | Martha              | Clinical intervention (other)    | 2                | 1   | 3     | 2           | Yes | None                      | None                | Critically low             |
| 75  | Martin              | Public health intervention       | 14               | 18  | 32    | 14          | Yes | Foundation/NGO            | Industry            | Critically low             |
| 76  | Martson             | Clinical intervention (drug)     | 8                | 16  | 24    | 8           | No  | Foundation/NGO            | None                | Low                        |
| 77  | Mecenas             | Clinical intervention (surgical) | 5                | 1   | 6     |             | No  | Not reported              | Not reported        | Moderate                   |
| 78  | Meuwese             | Clinical intervention (surgical) | 8                |     | 8     | 7           | Yes | None                      | Industry            | Critically low             |
| 79  | Mian                | Clinical intervention (other)    | 6                | 2   | 8     | 6           | Yes | None                      | Industry            | Moderate                   |
| 80  | Moda                | Clinical intervention (surgical) | 3                | 2   | 5     | 3           | No  | Not reported              | Not reported        | Low                        |
| 81  | Mujcic              | Public health intervention       | 5                | 12  | 17    | 1           | Yes | Foundation/NGO            | Academic            | Critically low             |
| 82  | Muñoz Aguilera      | Non-interventional               | 74               | 8   | 82    | 2           | Yes | Government                | None                | Critically low             |
| 83  | Né                  | Clinical intervention (other)    | 3                | 1   | 4     | 3           | No  | None                      | None                | Moderate                   |
| 84  | Nizam               | Clinical intervention (other)    | 4                | 6   | 10    | 4           | Yes | Not reported              | None                | Critically low             |
| 85  | Nylander Vujovic    | Clinical intervention (drug)     | 14               | 2   | 16    | 13          | No  | Government                | None                | Moderate                   |
| 86  | Okolie              | Public health intervention       | 14               |     | 14    | 13          | Yes | Multiple (excl. industry) | Academic            | High                       |
| 87  | Omori               | Clinical intervention (surgical) | 9                |     | 9     | 9           | Yes | Multiple (incl. industry) | None                | Low                        |
| 88  | Ordean              | Environmental exposure           | 2                |     | 2     | 2           | No  | Academic                  | Academic            | Critically low             |
| 89  | Oteri               | Public health intervention       | 15               |     | 15    |             | No  | None                      | None                | Low                        |
| 90  | Palmowski           | Clinical intervention (other)    | 5                | 1   | 6     |             | No  | Not reported              | Academic            | Moderate                   |
| 91  | Podlasek            | Clinical intervention (drug)     | 54               |     | 54    | 5           | Yes | None                      | None                | Critically low             |
| 92  | Rayner              | Clinical intervention (surgical) | 13               |     | 13    | 15          | Yes | Multiple (excl. industry) | None                | Low                        |
| 93  | Rhodes              | Public health intervention       | 5                | 8   | 13    |             | No  | Multiple (excl. industry) | None                | Critically low             |
| 94  | Rodrigues           | Clinical intervention (drug)     | 8                |     | 8     | 10          | Yes | None                      | Industry            | Low                        |
| 95  | Rys                 | Clinical intervention (other)    | 16               |     | 16    |             | Yes | Government                | None                | Low                        |
| 96  | Sagae               | Clinical intervention (surgical) | 6                |     | 6     | 6           | Yes | None                      | Industry            | Low                        |
| 97  | Schimmack           | Clinical intervention (drug)     | 4                |     | 4     | 4           | Yes | None                      | None                | Low                        |
| 98  | Schmidt             | Clinical intervention (other)    | 9                | 1   | 10    | 1           | No  | Not reported              | Not reported        | Low                        |
| 99  | Schutyser           | Clinical intervention (drug)     | 15               |     | 15    | 2           | No  | Foundation/NGO            | None                | Low                        |
| 100 | Sennesael           | Public health intervention       | 16               |     | 16    |             | No  | Government                | None                | Critically low             |
| 101 | Sfakianoudis        | Clinical intervention (drug)     | 9                |     | 9     | 14          | Yes | Not reported              | None                | Critically low             |
| 102 | Sideris             | Non-interventional               | 30               |     | 30    | 30          | Yes | None                      | None                | Critically low             |
| 103 | Singh               | Clinical intervention (drug)     | 15               | 2   | 17    | 10          | Yes | Government                | None                | Low                        |
| 104 | Sletvold            | Public health intervention       | 5                | 18  | 23    | 5           | No  | Multiple (excl. industry) | Industry            | Critically low             |
| 105 | Sterpetti           | Clinical intervention (surgical) | 27               |     | 27    | 27          | Yes | Not reported              | None                | Critically low             |
| 106 | Su                  | Clinical intervention (surgical) | 15               | 3   | 18    |             | Yes | Not reported              | None                | Critically low             |

MA: Meta-analysis. NRS: Non-randomised study. RCT: Randomised controlled trial. RoB: Risk of bias.

|     | First author  | Type of intervention             | Included studies |     |       | Extracted   |     |                | Competing interests | AMSTAR 2 confidence rating |
|-----|---------------|----------------------------------|------------------|-----|-------|-------------|-----|----------------|---------------------|----------------------------|
|     |               |                                  | NRS              | RCT | Total | RoB ratings | MA? | Funding        |                     |                            |
| 107 | Suarez        | Clinical intervention (other)    | 84               | 7   | 91    | 15          | Yes | None           | Academic            | Moderate                   |
| 108 | Tadount       | Clinical intervention (drug)     | 15               | 31  | 46    | 28          | No  | Government     | None                | Moderate                   |
| 109 | Tan           | Public health intervention       | 26               | 20  | 46    |             | No  | Government     | None                | Low                        |
| 110 | Tlapa         | Public health intervention       | 40               |     | 40    | 40          | No  | None           | None                | Low                        |
| 111 | Triantafyllou | Clinical intervention (other)    | 4                | 4   | 8     | 4           | Yes | Not reported   | None                | Critically low             |
| 112 | Tsaousi       | Clinical intervention (drug)     | 6                | 3   | 9     | 6           | Yes | None           | None                | Critically low             |
| 113 | Tseng         | Clinical intervention (other)    | 2                |     | 2     | 4           | Yes | Not reported   | None                | Critically low             |
| 114 | Tzoumas       | Clinical intervention (surgical) | 11               |     | 11    | 11          | Yes | None           | None                | Critically low             |
| 115 | Veloso        | Clinical intervention (other)    | 4                | 18  | 22    | 4           | No  | Government     | None                | Critically low             |
| 116 | Vygen-Bonnet  | Clinical intervention (drug)     | 19               | 3   | 22    | 19          | No  | None           | Industry            | Low                        |
| 117 | Wang          | Clinical intervention (other)    | 6                | 4   | 10    | 1           | Yes | Not reported   | None                | Low                        |
| 118 | Wiseman-Hakes | Clinical intervention (other)    | 9                | 3   | 12    | 3           | No  | Government     | None                | Moderate                   |
| 119 | Wong          | Public health intervention       | 9                | 4   | 13    |             | No  | Foundation/NGO | None                | Low                        |
| 120 | Young         | Non-clinical intervention        | 85               |     | 85    | 137         | Yes | Not reported   | Not reported        | Moderate                   |
| 121 | Zha           | Clinical intervention (drug)     | 9                | 1   | 10    | 9           | Yes | Other          | None                | Low                        |
| 122 | Zhao          | Clinical intervention (surgical) | 11               | 1   | 12    |             | Yes | Government     | None                | Critically low             |
| 123 | Zittermann    | Clinical intervention (drug)     | 27               |     | 27    | 27          | Yes | None           | None                | Low                        |
| 124 | Zymperdikas   | Clinical intervention (drug)     | 7                |     | 7     | 1           | No  | None           | None                | Moderate                   |

MA: Meta-analysis. NRS: Non-randomised study. RCT: Randomised controlled trial. RoB: Risk of bias.



**Supplementary Table 4: Modifications and non-standard uses of ROBINS-I**

|    | First author | Reported duplicate ROBINS-I assessment | Reported ROBINS-I pre-assessment stage  | Reported overall judgements | Reported domain-specific judgements | Reported justifications for RoB judgements | Rating scale        | Other issues in the application of ROBINS-I |
|----|--------------|----------------------------------------|-----------------------------------------|-----------------------------|-------------------------------------|--------------------------------------------|---------------------|---------------------------------------------|
| 1  | Agnelli      | Yes                                    | None                                    | Yes                         | Yes                                 | None                                       | Standard scale      | Omitted domain 4                            |
| 2  | Alshafei     | Yes                                    | None                                    | Yes                         | Partially                           | None                                       | Standard scale      |                                             |
| 3  | Arn          | No                                     | None                                    | Yes                         | Yes                                 | None                                       | Standard scale      |                                             |
| 4  | Baker        | Yes                                    | None                                    | Yes                         | No                                  | None                                       | Low, Moderate, High |                                             |
| 5  | Balla        | Yes                                    | None                                    | Yes                         | Yes                                 | None                                       | Standard scale      |                                             |
| 6  | Bang         | Yes                                    | None                                    | Yes                         | Yes                                 | None                                       | Standard scale      |                                             |
| 7  | Belachew     | Yes                                    | None                                    | No                          | No                                  | None                                       | None                |                                             |
| 8  | Belk         | Yes                                    | None                                    | No                          | Yes                                 | None                                       | Standard scale      |                                             |
| 9  | Bellos       | Yes                                    | None                                    | Yes                         | Yes                                 | None                                       | Standard scale      |                                             |
| 10 | Bezeczkzy    | Yes                                    | None                                    | Yes                         | No                                  | None                                       | Standard scale      |                                             |
| 11 | Brennan      | Partially                              | Confounders and co-interventions listed | Yes                         | Yes                                 | Overall and bias domains                   | Standard scale      |                                             |
| 12 | Brouwer      | Yes                                    | None                                    | Yes                         | Yes                                 | None                                       | Standard scale      | Included critical-RoB studies in synthesis. |
| 13 | Cardoso      | No                                     | None                                    | Yes                         | Yes                                 | None                                       | Low, Moderate, High |                                             |
| 14 | Carrier      | Yes                                    | Confounders and co-interventions listed | Yes                         | Yes                                 | None                                       | Standard scale      |                                             |
| 15 | Carter       | Yes                                    | None                                    | Yes                         | Yes                                 | Bias domains only                          | Standard scale      |                                             |
| 16 | Checucci (a) | No                                     | None                                    | No                          | Yes                                 | None                                       | Standard scale      |                                             |
| 17 | Checucci (b) | Yes                                    | None                                    | Yes                         | Partially                           | None                                       | Low, Moderate, High |                                             |
| 18 | Chen         | Yes                                    | None                                    | Yes                         | Yes                                 | None                                       | Standard scale      |                                             |
| 19 | Coates       | Yes                                    | None                                    | Yes                         | No                                  | None                                       | Standard scale      |                                             |
| 20 | Cutts        | No                                     | None                                    | No                          | Yes                                 | None                                       | Standard scale      |                                             |
| 21 | Daugaard     | No                                     | Confounders listed                      | Yes                         | Yes                                 | None                                       | Standard scale      |                                             |
| 22 | Davidson     | No                                     | None                                    | Yes                         | Yes                                 | None                                       | Standard scale      |                                             |

RoB: Risk of bias.

|    | First author | Reported duplicate ROBINS-I assessment | Reported ROBINS-I pre-assessment stage | Reported overall judgements | Reported domain-specific judgements | Reported justifications for RoB judgements | Rating scale                       | Other issues in the application of ROBINS-I            |
|----|--------------|----------------------------------------|----------------------------------------|-----------------------------|-------------------------------------|--------------------------------------------|------------------------------------|--------------------------------------------------------|
| 23 | DeNicola     | Yes                                    | None                                   | Yes                         | Partially                           | None                                       | Low, High, Unclear                 |                                                        |
| 24 | Di Giuseppe  | Yes                                    | None                                   | Yes                         | Yes                                 | None                                       | Standard scale                     | Included critical-RoB studies in synthesis.            |
| 25 | Djade        | Yes                                    | None                                   | No                          | Yes                                 | Bias domains only                          | Standard scale                     |                                                        |
| 26 | Djarv        | Yes                                    | None                                   | No                          | Partially                           | None                                       | Not serious, Serious               |                                                        |
| 27 | Falk Brekke  | Yes                                    | None                                   | Yes                         | Yes                                 | None                                       | Standard scale                     | Included critical-RoB studies in synthesis.            |
| 28 | Fang         | Yes                                    | Confounders listed                     | Yes                         | Yes                                 | None                                       | Standard scale                     |                                                        |
| 29 | Ford         | Yes                                    | None                                   | Yes                         | Yes                                 | None                                       | Standard scale                     |                                                        |
| 30 | Frascella    | No                                     | None                                   | Yes                         | Yes                                 | None                                       | Green, Yellow, Red                 |                                                        |
| 31 | Froggatt     | No                                     | None                                   | Yes                         | Yes                                 | None                                       | Low, Moderate, High                |                                                        |
| 32 | Gagelmann    | No                                     | None                                   | Yes                         | Yes                                 | None                                       | Yes, Probably Yes, Probably No, No | Included critical-RoB studies in meta-analysis.        |
| 33 | Gandolla     | Yes                                    | None                                   | No                          | Yes                                 | Bias domains only                          | Standard scale                     |                                                        |
| 34 | Garbazza     | No                                     | None                                   | No                          | Yes                                 | None                                       | Standard scale                     |                                                        |
| 35 | Geierlehner  | No                                     | None                                   | Yes                         | Yes                                 | None                                       | Standard scale                     |                                                        |
| 36 | Gentile      | No                                     | None                                   | No                          | No                                  | None                                       | None                               |                                                        |
| 37 | Giannopoulos | Yes                                    | None                                   | Yes                         | Yes                                 | None                                       | Standard scale                     |                                                        |
| 38 | Giles        | Yes                                    | None                                   | Yes                         | Yes                                 | None                                       | +, -, Not Assessable               |                                                        |
| 39 | Gogou        | Yes                                    | None                                   | Yes                         | Yes                                 | None                                       | Low, Moderate, Serious, Unknown    | Reported domain 3 as 'Not applicable' for all studies. |
| 40 | Goldshtein   | Yes                                    | None                                   | Yes                         | No                                  | Overall only                               | Low, Moderate, Serious             |                                                        |
| 41 | Gottlieb     | Yes                                    | None                                   | Yes                         | Yes                                 | None                                       | Standard scale                     |                                                        |
| 42 | Graham       | Yes                                    | Confounders listed                     | No                          | No                                  | None                                       | Standard scale                     |                                                        |
| 43 | Guo          | Yes                                    | None                                   | Yes                         | Yes                                 | None                                       | Standard scale                     |                                                        |
| 44 | Gupta        | Yes                                    | None                                   | Yes                         | Yes                                 | None                                       | Standard scale                     |                                                        |
| 45 | Hajibandeh   | Yes                                    | None                                   | No                          | Yes                                 | None                                       | Low, High, Unclear                 |                                                        |
| 46 | Hajibandeh   | Yes                                    | None                                   | No                          | Yes                                 | None                                       | Low, High, Unclear                 |                                                        |
| 47 | Handel       | No                                     | None                                   | Yes                         | Yes                                 | None                                       | Standard scale                     |                                                        |

RoB: Risk of bias.

|    | First author        | Reported duplicate ROBINS-I assessment | Reported ROBINS-I pre-assessment stage | Reported overall judgements | Reported domain-specific judgements | Reported justifications for RoB judgements | Rating scale                                       | Other issues in the application of ROBINS-I                         |
|----|---------------------|----------------------------------------|----------------------------------------|-----------------------------|-------------------------------------|--------------------------------------------|----------------------------------------------------|---------------------------------------------------------------------|
| 48 | Hasperhoven         | No                                     | None                                   | Yes                         | Yes                                 | None                                       | Standard scale                                     | Included critical-RoB studies in meta-analysis.                     |
| 49 | Heesen              | Yes                                    | None                                   | No                          | Yes                                 | None                                       | Standard scale                                     |                                                                     |
| 50 | Hsu                 | Yes                                    | None                                   | Yes                         | Yes                                 | None                                       | Standard scale                                     | Non-standard method for determining overall judgement. <sup>1</sup> |
| 51 | Hu                  | No                                     | None                                   | No                          | Yes                                 | None                                       | High Quality, Low Quality                          |                                                                     |
| 52 | Huang               | Yes                                    | None                                   | Yes                         | Partially                           | None                                       | Standard scale                                     | Included critical-RoB studies in meta-analysis.                     |
| 53 | Indarwati           | Yes                                    | None                                   | Yes                         | Yes                                 | None                                       | Standard scale                                     |                                                                     |
| 54 | Jassal              | No                                     | None                                   | No                          | Yes                                 | None                                       | Standard scale                                     | Included critical-RoB studies in synthesis.                         |
| 55 | Kamfose             | Yes                                    | None                                   | Yes                         | Yes                                 | None                                       | Standard scale                                     |                                                                     |
| 56 | Karamini            | Yes                                    | None                                   | Yes                         | Yes                                 | None                                       | Standard scale                                     | Included critical-RoB studies in meta-analysis.                     |
| 57 | Kling               | No                                     | None                                   | Yes                         | Yes                                 | None                                       | Standard scale                                     |                                                                     |
| 58 | Koenig              | Partially                              | None                                   | Yes                         | Yes                                 | None                                       | Standard scale                                     | Included critical-RoB studies in meta-analysis.                     |
| 59 | Kokkinidis          | Yes                                    | None                                   | No                          | No                                  | None                                       | None                                               |                                                                     |
| 60 | Kolding             | Yes                                    | None                                   | No                          | Yes                                 | None                                       | Standard scale                                     | Included critical-RoB studies in meta-analysis.                     |
| 61 | Kowalewski          | Yes                                    | None                                   | Yes                         | Yes                                 | None                                       | Standard scale                                     |                                                                     |
| 62 | Lam                 | No                                     | None                                   | Yes                         | Yes                                 | None                                       | +, -, ?                                            | Included critical-RoB studies in meta-analysis.                     |
| 63 | Leach               | Yes                                    | None                                   | Yes                         | Yes                                 | None                                       | Low, Moderate, High, Unclear                       |                                                                     |
| 64 | Lee (a)             | Yes                                    | None                                   | Yes                         | Yes                                 | None                                       | Standard scale                                     | Included critical-RoB studies in synthesis.                         |
| 65 | Lee (b)             | Yes                                    | None                                   | Partially                   | Yes                                 | None                                       | Standard scale                                     |                                                                     |
| 66 | Lee (c)             | No                                     | None                                   | Yes                         | Yes                                 | None                                       | Yes, Probably Yes, Probably No, No, No information | Included critical-RoB studies in synthesis.                         |
| 67 | Liu                 | Yes                                    | None                                   | Yes                         | Yes                                 | Overall and bias domains                   | Standard scale                                     |                                                                     |
| 68 | Louwers             | Yes                                    | None                                   | Yes                         | Yes                                 | None                                       | Standard scale                                     | Included critical-RoB studies in synthesis.                         |
| 69 | Lu                  | Yes                                    | None                                   | Yes                         | Yes                                 | None                                       | Standard scale                                     |                                                                     |
| 70 | Lussier             | No                                     | None                                   | Yes                         | Yes                                 | None                                       | Standard scale                                     | Included critical-RoB studies in synthesis.                         |
| 71 | Ma                  | Yes                                    | None                                   | Yes                         | Yes                                 | None                                       | Standard scale                                     |                                                                     |
| 72 | Mac Giolla Phadraig | Yes                                    | None                                   | Yes                         | Yes                                 | None                                       | Low, Moderate, Serious, Critical, Severe           | Included critical-RoB studies in meta-analysis.                     |
| 73 | Manohar             | Yes                                    | None                                   | Yes                         | Yes                                 | None                                       | Standard scale                                     |                                                                     |
| 74 | Martha              | Yes                                    | None                                   | Yes                         | Yes                                 | None                                       | Standard scale                                     | Included critical-RoB studies in synthesis.                         |
| 75 | Martin              | Yes                                    | None                                   | Yes                         | Yes                                 | None                                       | Standard scale                                     |                                                                     |
| 76 | Martson             | Yes                                    | None                                   | Yes                         | Yes                                 | None                                       | Standard scale                                     | Included critical-RoB studies in synthesis.                         |
| 77 | Mecenas             | Yes                                    | None                                   | Yes                         | Yes                                 | None                                       | Low, Moderate, High                                |                                                                     |

|     | First author     | Reported duplicate ROBINS-I assessment | Reported ROBINS-I pre-assessment stage  | Reported overall judgements | Reported domain-specific judgements | Reported justifications for RoB judgements | Rating scale             | Other issues in the application of ROBINS-I                                      |
|-----|------------------|----------------------------------------|-----------------------------------------|-----------------------------|-------------------------------------|--------------------------------------------|--------------------------|----------------------------------------------------------------------------------|
| 78  | Meuwese          | No                                     | None                                    | No                          | Yes                                 | None                                       | Standard scale           |                                                                                  |
| 79  | Mian             | Yes                                    | None                                    | Yes                         | Yes                                 | None                                       | Standard scale           |                                                                                  |
| 80  | Moda             | No                                     | None                                    | Yes                         | Yes                                 | None                                       | Standard scale           |                                                                                  |
| 81  | Mujcic           | Yes                                    | None                                    | Yes                         | Yes                                 | None                                       | Standard scale           |                                                                                  |
| 82  | Muñoz Aguilera   | Yes                                    | None                                    | Yes                         | Yes                                 | None                                       | Standard scale           |                                                                                  |
| 83  | Né               | Yes                                    | None                                    | Yes                         | Yes                                 | None                                       | Standard scale           |                                                                                  |
| 84  | Nizam            | No                                     | None                                    | Yes                         | Yes                                 | None                                       | Standard scale           |                                                                                  |
| 85  | Nylander Vujovic | Yes                                    | Confounders listed                      | Yes                         | Yes                                 | None                                       | Standard scale           | Included critical-RoB studies in synthesis.                                      |
| 86  | Okolie           | Yes                                    | None                                    | Yes                         | Yes                                 | Overall and bias domains                   | Standard scale           |                                                                                  |
| 87  | Omori            | Yes                                    | None                                    | Yes                         | Yes                                 | Overall and bias domains                   | Standard scale           |                                                                                  |
| 88  | Ordean           | No                                     | None                                    | No                          | Yes                                 | None                                       | Standard scale           |                                                                                  |
| 89  | Oteri            | Yes                                    | None                                    | Yes                         | Yes                                 | None                                       | Low, Moderate, High      | Omitted domain 4                                                                 |
| 90  | Palmowski        | Yes                                    | None                                    | No                          | Yes                                 | None                                       | Low, High, Unclear       | Omitted domain 4                                                                 |
| 91  | Podlasek         | No                                     | None                                    | Yes                         | No                                  | None                                       | Standard scale           |                                                                                  |
| 92  | Rayner           | No                                     | None                                    | Yes                         | Yes                                 | None                                       | Standard scale           |                                                                                  |
| 93  | Rhodes           | Yes                                    | None                                    | Yes                         | Yes                                 | None                                       | Low, Some Concerns, High |                                                                                  |
| 94  | Rodrigues        | No                                     | Confounders and co-interventions listed | Yes                         | Yes                                 | None                                       | Standard scale           |                                                                                  |
| 95  | Rys              | No                                     | None                                    | No                          | No                                  | None                                       | None                     |                                                                                  |
| 96  | Sagae            | No                                     | None                                    | Yes                         | Yes                                 | None                                       | Standard scale           |                                                                                  |
| 97  | Schimmack        | No                                     | None                                    | Yes                         | Yes                                 | Overall only                               | Standard scale           |                                                                                  |
| 98  | Schmidt          | No                                     | None                                    | Yes                         | Partially                           | None                                       | Standard scale           |                                                                                  |
| 99  | Schutysen        | Yes                                    | None                                    | Yes                         | Yes                                 | None                                       | Standard scale           |                                                                                  |
| 100 | Sennesael        | Yes                                    | None                                    | Yes                         | Yes                                 | None                                       | Low, High, Unclear       | Reported ROBINS-I alongside Cochrane RoB 2.0, with domains renamed. <sup>2</sup> |
| 101 | Sfakianoudis     | Yes                                    | None                                    | Yes                         | Yes                                 | None                                       | Standard scale           |                                                                                  |
| 102 | Sideris          | No                                     | None                                    | Yes                         | Yes                                 | None                                       | Standard scale           |                                                                                  |
| 103 | Singh            | Yes                                    | None                                    | Yes                         | Yes                                 | None                                       | Standard scale           | Added domain: 'Vested interest bias'. <sup>3</sup>                               |
| 104 | Sletvold         | Yes                                    | None                                    | Yes                         | No                                  | None                                       | Standard scale           |                                                                                  |
| 105 | Sterpetti        | Yes                                    | None                                    | Partially                   | No                                  | None                                       | Standard scale           |                                                                                  |

RoB: Risk of bias.

|     | First author  | Reported duplicate ROBINS-I assessment | Reported ROBINS-I pre-assessment stage | Reported overall judgements | Reported domain-specific judgements | Reported justifications for RoB judgements | Rating scale             | Other issues in the application of ROBINS-I                                          |
|-----|---------------|----------------------------------------|----------------------------------------|-----------------------------|-------------------------------------|--------------------------------------------|--------------------------|--------------------------------------------------------------------------------------|
| 106 | Su            | Yes                                    | None                                   | No                          | No                                  | Bias domains only                          | None                     | Only reported free-text descriptions of judgements in each bias domain. <sup>4</sup> |
| 107 | Suarez        | Yes                                    | None                                   | Yes                         | Yes                                 | None                                       | Standard scale           | Included critical-RoB studies in meta-analysis.                                      |
| 108 | Tadount       | Yes                                    | Confounders listed                     | Yes                         | Partially                           | None                                       | Standard scale           | Included critical-RoB studies in synthesis.                                          |
| 109 | Tan           | Yes                                    | None                                   | Yes                         | No                                  | Overall only                               | Low, Moderate, High      | Non-standard process for determining overall score. <sup>5</sup>                     |
| 110 | Tlapa         | Yes                                    | None                                   | Yes                         | No                                  | None                                       | Standard scale           | Included critical-RoB studies in synthesis.                                          |
| 111 | Triantafyllou | No                                     | None                                   | No                          | Yes                                 | None                                       | Standard scale           |                                                                                      |
| 112 | Tsaousi       | Yes                                    | None                                   | Yes                         | Yes                                 | None                                       | Standard scale           | Included critical-RoB studies in meta-analysis.                                      |
| 113 | Tseng         | No                                     | None                                   | Yes                         | Yes                                 | None                                       | Standard scale           |                                                                                      |
| 114 | Tzoumas       | Yes                                    | None                                   | No                          | Yes                                 | None                                       | Standard scale           |                                                                                      |
| 115 | Veloso        | Yes                                    | None                                   | Yes                         | Yes                                 | None                                       | Standard scale           |                                                                                      |
| 116 | Vygen-Bonnet  | Yes                                    | None                                   | Yes                         | Yes                                 | None                                       | Standard scale           | Included critical-RoB studies in synthesis.                                          |
| 117 | Wang          | No                                     | None                                   | Yes                         | Yes                                 | Overall and bias domains                   | Standard scale           |                                                                                      |
| 118 | Wiseman-Hakes | Yes                                    | None                                   | Yes                         | Yes                                 | None                                       | Standard scale           |                                                                                      |
| 119 | Wong          | Yes                                    | None                                   | Yes                         | Partially                           | None                                       | Low, Moderate, High, N/A |                                                                                      |
| 120 | Young         | Yes                                    | None                                   | Yes                         | Yes                                 | Overall and bias domains                   | Standard scale           | Included critical-RoB studies in meta-analysis.                                      |
| 121 | Zha           | No                                     | None                                   | Yes                         | Yes                                 | None                                       | Standard scale           | Included critical-RoB studies in meta-analysis.                                      |
| 122 | Zhao          | Yes                                    | None                                   | Yes                         | Yes                                 | None                                       | Low, Moderate, High      |                                                                                      |
| 123 | Zittermann    | No                                     | None                                   | No                          | Yes                                 | Bias domains only                          | Standard scale           |                                                                                      |
| 124 | Zymperdikas   | Yes                                    | None                                   | Yes                         | Yes                                 | None                                       | Standard scale           | Included critical-RoB studies in synthesis.                                          |

RoB: Risk of bias.

---

<sup>1</sup>Quotation: 'Each item in the assessment criteria was given a score of 1 if it was fulfilled (a negative item is considered fulfilled if it is avoided) in the article, and a score of 0 if was not fulfilled or if there was insufficient evidence to make a clear statement. Where a criterion was not considered by the study, it was marked as not applicable. The total score of each study was calculated by dividing the number of items included by the number of applicable items, yielding a score between 0 and 1. The methodological quality was considered low if the score was between 0 and 0.5 and high if the score was between 0.51 and 1.'

<sup>2</sup>Names used for bias domains: 'Confounding', 'Selection bias', 'Performance bias', 'Misclassification bias', 'Attrition bias', 'Detection bias', 'Reporting bias'.

<sup>3</sup>Quotation: 'Vested interest bias was defined as studies that were sponsored by the drug manufacturing pharmaceutical company. Studies were considered to be at a high risk of bias if the sponsoring companies had access to the data and/or were involved in the reporting of study.'

<sup>4</sup>Example of free-text risk-of-bias judgements:

'Confounding: No.

Selection bias: Not described.

Classification of interventions: Clearly defined.

Deviations from intended interventions: No.

Missing data: No loss to follow-up.

Bias in measurement of outcomes: No.

Bias in selection of the reported result: No.'

<sup>5</sup>Quotation: 'Studies that had "low" or "high" risk in most of the domains were classified as having an overall "low" or "high" bias, respectively, while those that yielded "unclear" or "moderate" risks in two or more domains were classified as having an overall "moderate" risk.'

**Supplementary Table 5: Overall ROBINS-I risk-of-bias judgements compared to the highest judgement in an individual domain**

| Overall risk-of-bias judgement | Highest individual bias domain judgement |           |           |           | Total |
|--------------------------------|------------------------------------------|-----------|-----------|-----------|-------|
|                                | Low                                      | Moderate  | Serious   | Critical  |       |
| Low                            | 42% (30)                                 | 28% (20)  | 3% (2)    | 27% (19)  | 71    |
| Moderate                       | 0% (1)                                   | 83% (276) | 13% (43)  | 4% (13)   | 333   |
| Serious                        | 0% (0)                                   | 1% (2)    | 97% (279) | 2% (6)    | 287   |
| Critical                       | 0% (0)                                   | 0% (0)    | 2% (4)    | 98% (259) | 263   |
| No Information                 | 20% (1)                                  | 20% (1)   | 60% (3)   | 0% (0)    | 5     |

Excludes assessments where any bias domain is missing (including overall) and assessments reported using a non-standard scale.

**Supplementary Figure 1: Summary of quality ratings of the included systematic reviews for each individual item in the AMSTAR 2 tool**

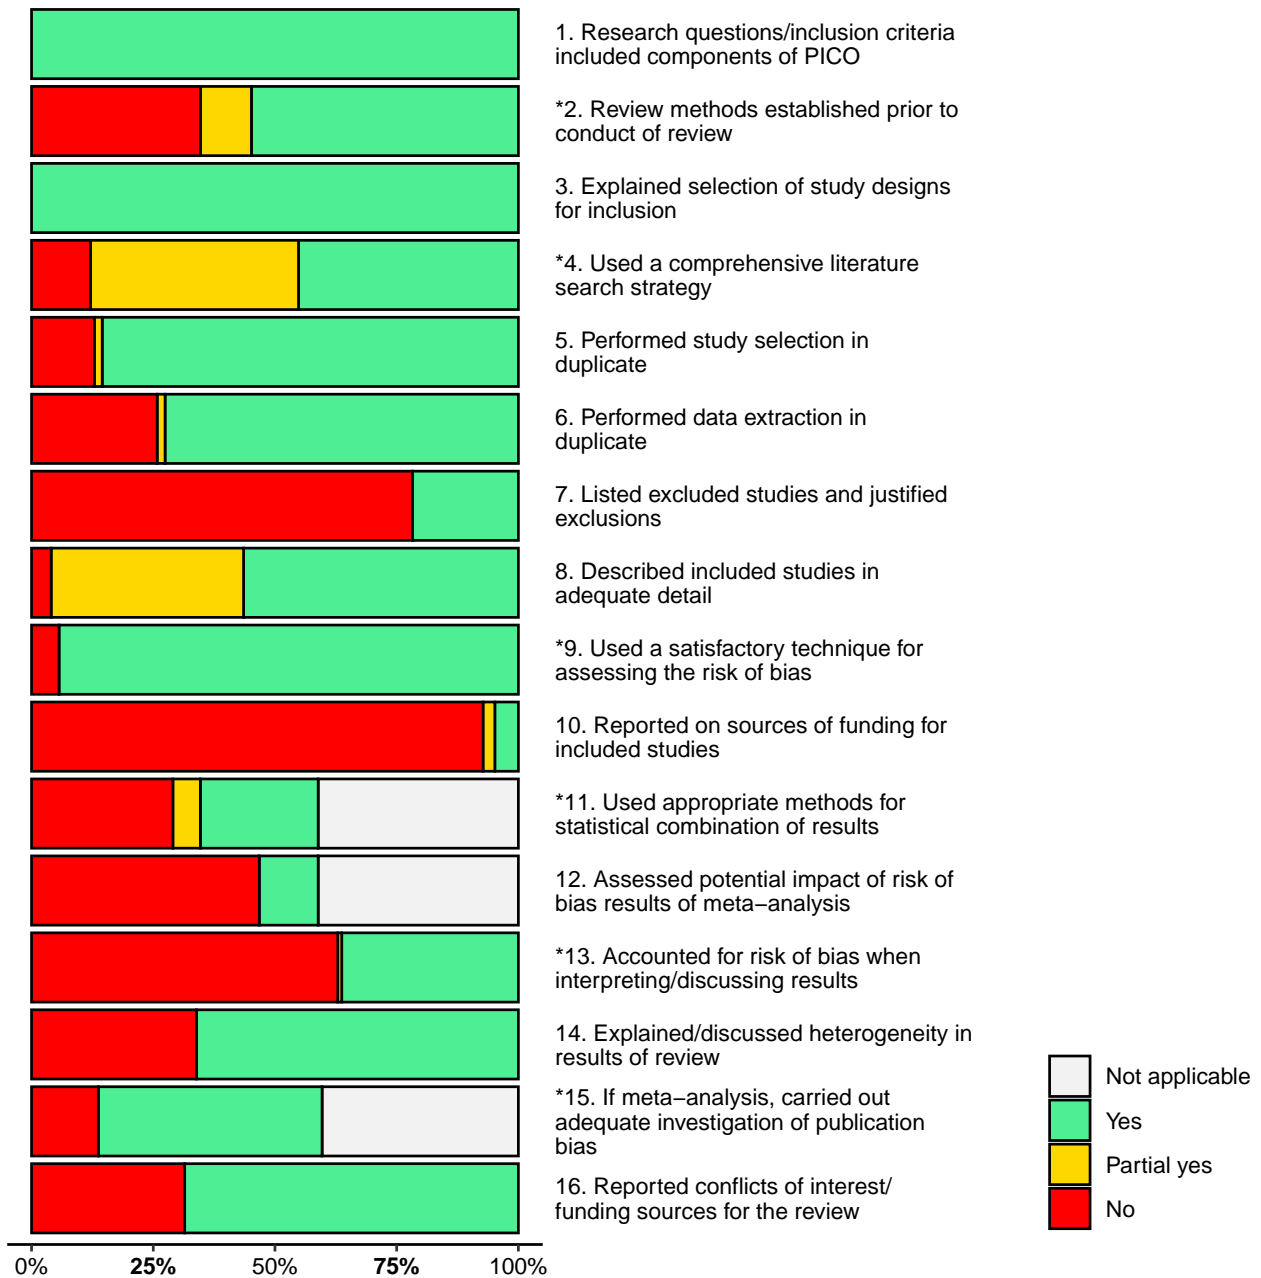

\* Critical item.



**Supplementary Figure 2: Distribution of risk-of-bias judgements in each bias domain for studies assessed using ROBINS-I within the included systematic reviews, stratified by the AMSTAR 2 confidence rating of the review**

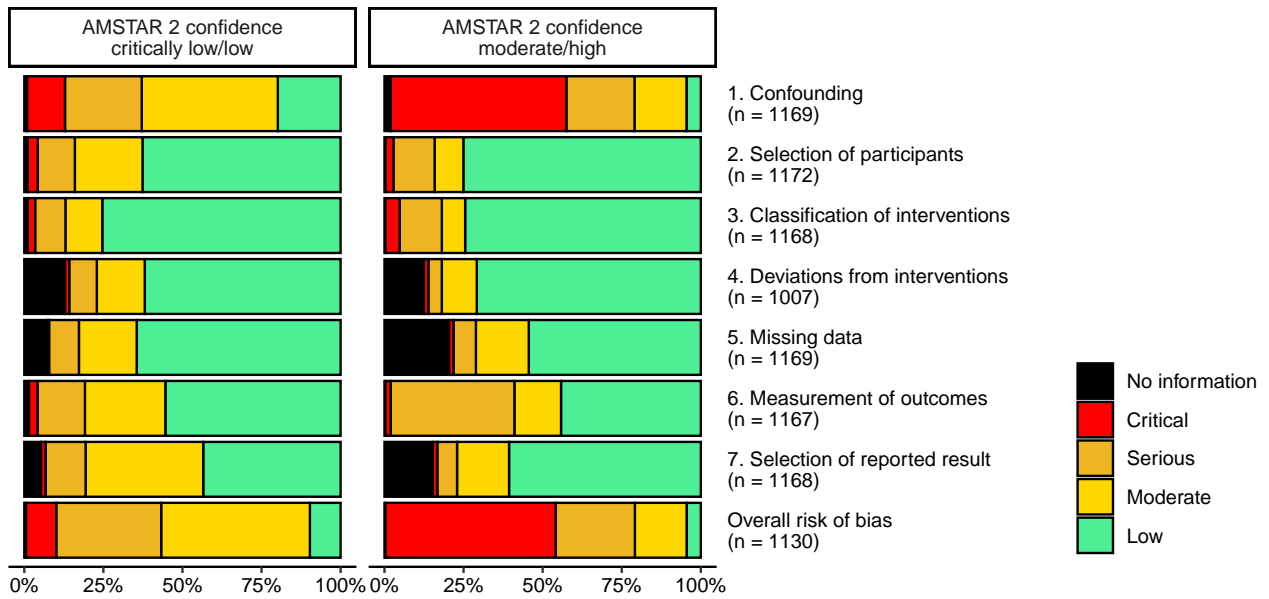

Supplement: mmc1.pdf [file mmc1.pdf]
